# Supplementary material for: Development and validation of a nomogram predicting multidrug-resistant tuberculosis risk in East China
Source: PeerJ. 2025 Feb 27;13:e19112. doi: 10.7717/peerj.19112 (PMC11874934; doi:10.7717/peerj.19112)
Supplement: Supplemental Information 7 — 448 cases of tuberculosis patients from Anhui Chest Hospital and 116 cases of MDR-TB patients from Anhui Provincial Hospital Infection District. [file peerj-13-19112-s007.xlsx]

## Sheet: train
ID	History of drug resistance	CREA(umol/L)	Fever(Yes =1, No =0)	FIB（g/L）	Invasive-operation(Yes =1, No =0)	Hypertension(Yes =1, No =0)	Extrapulmonary-tuberculosis(Yes =1, No =0)	Disease-duration(Months)	LYMPH（*10^9/L）	Age(Years)	ESR（mm/h）	PLT（*10^9/L）	D-D(mg/L)	Time-from-symptom-onset-to-visit(Delay in seeking medical treatment is defined as a gap of more than two weeks between the onset of symptoms and the first medical consultation; Delayed = 1, Not delayed = 0)	Drinking-history（0=No，1=Yes）	Tumor（0=No，1=Yes）	APTT(s)	UREA(mmol/L)	Long-term-use-of-antibiotics（0=No，1=Yes）	Night sweats（0=No，1=Yes）	Weight loss （0=No，1=Yes）	Imaging (single lobe =0, multiple lobes =1)	TBIL(umol/L)	Cough (Yes =1, None =0)	Annual income (ten thousand yuan, higher than the average income level in Anhui Province =1, lower than =0)	Headache (Yes =1, None =0)	Smoking history (Yes =1, None =0)	PT(s)	CRP(mg/L)	Marital status (married =1, unmarried =0)	Sputum smear (positive 1, negative 0)	GLU（mmol/L）	Connective tissue disease (Yes =1, No =0)	Pneumothorax (Yes =1, No =0)	Nephropathy (Yes =1, None =0)	Whether the lungs have moist rales (Yes =1, No =0)	Hypoxia (Yes =1, None =0)	Sex (male =1, female =0)	Na(mmol/L)	ALT(u/L)	Education (college degree or above, high education =1, low education =0)	WBC（*10^9/L）	Taking hormone for a long time (Yes =1, No =0)	Chest tightness (Yes =1, None =0)	Chest pain (Yes =1, None =0)	Contact history of pulmonary tuberculosis patients (Yes =1, No =0)	HGB(g/L)	Hemoptysis (Yes =1, No =0)	Autoimmune diseases (Yes =1, None =0)
patient1	MDR	60.4	1	5.99	0	0	0	7	1.62	49	21	316	0.11	1	0	0	28.1	5	0	0	0	1	14.7	1	0	0	1	11.8	6.84	1	1	5.09	0	0	0	0	0	1	139.1	22	0	6.96		0	0	0	4.49	0	0
patient2	MDR	60.7	0	2.35	0	0	0	4	1.4	45	6	192	0.03	1	0	0	28.6	5.5	0	0	0	1	6.3	1	0	0	0	10.6	3.49	1	1	4.84	0	0	0	0	0	0	139.1	6	0	3.64	0	0	0	0	108	0	0
patient3	MDR	70.2	0	1.79	0	0	0	24	1.99	23	37.5	198	0.03	0	0	0	24.8	5.5	1	0	0	0	11.6	0	1	0	0	11.2	1.38	0	0	6.13	0	0	0	0	0	0	137.4	115	1	7	0	0	0	0	130	0	0
patient4	MDR	103.5	0	3.54	0	0	0	96	0.76	64	7	137	0.04	0	0	0	30.8	4.9	1	0	0	1	12.1	1	0	0	0	12.6	3.97	1	0	5.06	0	1	0	0	0	1	142.4	5	0	4.2	0	1	0	0	102	1	0
patient5	MDR	50.8	0	2.95	0	0	0	60	0.77	63	35	359	0.91	1	1	0	31.6	4.2	0	0	1	1	9	1	0	0	1	12.4	36.09	1	1	5.02	0	1	0	0	0	1	136.1	14	0	6.66	0	0	0	0	91	0	0
patient6	MDR	49.2	1	3.79	0	0	0	3	1.45	66	16	161	0.14	0	1	0	26.5	200.2	0	0	0	1	15.6	1	0	0	1	10.6	18.5	1	0	7.57	0	0	0	0	0	1	4.32	22	0	7.04	0	0	0	0	132	0	0
patient7	MDR	57.1	0	2.74	0	0	0	24	0.92	53	15	193	0.12	0	0	0	26.6	426.1	0	0	1	1	19	1	0	0	0	10.8	5.22	1	0	4.83	0	0	0	0	0	1	143.8	1	0	4.62	0	0	0	0	132	0	0
patient8	MDR	63.5	0	1.3	0	0	0	2	1.78	69	2	334	0.22	0	0	0	27.4	4.8	0	0	0	0	15.3	0	0	0	1	12.3	42.55	1	0	6.19	0	0	0	0	0	1	141.5	41	0	8.19	0	0	0	0	138	0	0
patient9	MDR	77.1	0	2.83	1	0	0	120	1.05	52	2	164	0.08	1	0	0	25.6	8.6	0	0	0	1	7.8	1	0	0	0	11.1	3.57	0	0	5.05	0	0	0	0	0	1	143.4	11	0	3.87	0	0	0	0	142	0	0
patient10	MDR	60.7	0	2.13	1	0	0	12	1.55	57	6	110	0.07	0	0	0	25.3	4.8	0	1	0	0	22.2	1	0	0	0	12	4.19	1	0	5.11	0	0	0	0	0	0	143.5	3	0	4.98	0	0	0	0	108	0	0
patient11	MDR	68.8	0	1.86	0	0	0	12	1.4	49	2	332	0.05	0	0	0	29.2	3.5	0	0	0	1	5.9	1	1	0	0	10.8	0.91	1	0	5.01	0	0	0	0	0	0	142.9	7	0	3.42	0	0	0	0	119	0	0
patient12	MDR	73.4	0	3.51	0	1	0	5	2.13	45	37.5	160	0.3479	0	0	0	28.4	4.5	0	0	0	1	12.4	1	1	0	0	No	3.72	1	1	6.84	0	0	0	0	0	1	139.3	29	0	7.33	0	0	0	0	141	0	0
patient13	MDR	70.4	0	2.45	1	0	0	10	2	35	2	190	0.02	0	0	0	28.9	5.6	0	0	0	1	4.7	1	1	0	1	11.2	4.66	1	0	4.89	0	0	0	0	0	1	142.3	10	0	5.62	0	0	0	0	140	0	0
patient14	MDR	53	0	4.56	1	0	0	0.333333	1.34	51	24	429	0.14	0	0	0	29.1	3.7	0	0	0	1	7.6	1	0	0	0	11.2	3.21	1	1	4.56	0	0	0	0	0	1	141.4	12	0	7.09	0	0	0	0	123	1	0
patient15	MDR	47.4	0	2.53	0	0	1	60	0.39	52	3	98	0.49	0	0	0	26.8	9	0	0	0	1	17	1	0	0	0	16.6	38.11	1	0	5.69	0	0	0	1	1	0	135.8	8	0	6.65	0	1	0	0	74	0	0
patient16	MDR	62.5	0	2.09	0	0	0	2	1.69	55	2	141	0.04	0	0	0	26.7	6.8	0	0	0	1	11.1	0	1	0	0	11.3	2.08	1	0	6.15	0	0	0	0	0	1	142.2	23	0	5.03	0	0	0	0	136	0	0
patient17	MDR	62.9	0	4.18	1	1	0	84	0.98	69	66	266	0.1	0	0	0	24.6	9.4	0	0	1	1	6.7	1	0	0	0	10.4	12.05	1	1	6.26	0	0	0	0	0	0	141.1	11	0	8.11	0	0	0	0	107	0	0
patient18	MDR	78.7	0	2.65	0	1	0	84	1.46	58	37.5	226	0.04	0	0	0	25.4	9.1	0	0	0	1	10.7	1	1	0	1	12	6.71	1	0	5.1	0	0	0	0	0	1	144.4	22	1	6	0	1	0	0	139	0	0
patient19	MDR	61.1	1	5.38	0	0	1	9	1.1	47	54	338	0.17	0	0	0	28	5.5	0	0	1	1	6.8	1	1	0	0	11.6	57.61	1	1	4.55	0	0	0	0	0	1	140.3	11	0	7.85	0	0	0	0	108	0	0
patient20	MDR	108.9	0	3.19	0	0	0	72	1	55	37.5	165	0.19	0	0	0	28.6	6.4	0	0	0	1	15.5	1	0	0	1	12.6	No	1	0	3.98	0	0	0	0	0	1	140.3	10	0	4.08	0	1	1	0	114	0	0
patient21	MDR	54.5	0	3.47	1	0	1	2	1.67	68	37.5	239	0.09	0	0	0	27.9	4.1	0	0	0	1	11.2	0	1	0	0	10.6	0.36	1	0	5.42	0	0	0	0	0	0	139.1	16	1	4.36	0	0	0	0	120	0	0
patient22	MDR	60.1	1	3.71	0	0	1	132	1.11	34	97	433	0.47	1	0	0	32.4	4.2	0	0	0	1	7.1	1	0	0	1	13.3	61.09	1	0	5.31	0	0	0	0	0	1	134.7	15	0	4.8	0	0	0	0	113	0	0
patient23	MDR	44.1	0	3.25	0	1	0	24	0.93	51	12	122	0.08	0	0	0	28.8	5.3	0	1	1	1	17	1	0	0	0	11.1	13.17	1	1	6.92	0	0	0	0	0	1	139.7	26	0	4.8	0	0	0	0	115	0	0
patient24	MDR	50	0	3.4	0	0	0	168	1.25	45	37.5	467	0.2	0	0	0	29.9	3.6	0	0	0	1	10.9	1	0	0	0	10.6	43.08	1	1	4.37	0	0	0	0	0	1	135.6	9	0	7.23	0	0	0	0	108	1	0
patient25	MDR	67.6	1	3.69	0	0	0	12	0.96	80	42	169	0.05	1	0	0	27.6	6.9	0	0	0	1	7.6	1	0	0	1	11.9	11.06	1	1	5.02	0	0	0	1	0	1	142.1	13	0	5.2	0	0	0	0	106	0	0
patient26	MDR	71.6	0	2.49	1	0	0	12	0.67	81	52	100	0.35	0	0	0	26.7	6.7	0	0	0	1	17	1	0	0	0	11.4	13.88	1	1	7.18	0	0	0	1	0	0	135.9	18	0	3.6	0	0	0	0	83	0	0
patient27	MDR	51.9	0	2.49	0	0	0	120	2.38	44	37.5	278	0.1	1	1	0	29.1	5.9	0	0	0	1	9.4	1	1	0	1	12.7	5.53	1	0	3.89	0	0	0	1	0	1	139.8	11	1	7.7	0	0	0	0	132	0	0
patient28	MDR	102.1	0	4.18	0	0	0	3	1.45	58	29	236	0.18	1	0	0	29.6	7.6	0	0	1	0	16.9	1	0	0	0	12.2	55.8	0	1	15.29	0	0	0	0	0	1	130.3	36	0	8.81	0	0	1	0	130	1	0
patient29	MDR	69.8	1	4.68	1	1	0	72	0.45	48	67	222	0.28	0	0	0	28.5	5.1	0	1	0	1	13.8	1	0	0	0	13.3	No	0	0	14.46	0	1	0	0	0	1	133.5	66	0	15.01	0	1	0	0	121	0	0
patient30	MDR	68.5	0	1.77	0	0	1	3	1.82	24	37.5	194	0.05	0	0	0	29	3.1	0	0	0	0	7.2	0	1	0	0	11	4.15	0	0	4.8	0	0	0	0	0	1	140.06	35	1	5.81	0	0	0	0	148	0	0
patient31	MDR	68.6	0	4.29	1	0	0	60	2.2	44	20	153	0.1	1	0	0	28.8	4	0	0	0	1	11.2	1	0	0	0	11.5	33.86	1	0	5.61	0	0	0	0	0	1	138.5	21	0	7.94	0	0	0	0	136	0	0
patient32	MDR	52.2	0	2.25	1	0	0	360	1.08	55	19	199	0.16	0	0	0	24.4	3.2	0	0	0	1	10.3	1	0	0	0	11.4	43.51	1	1	4.59	0	0	0	0	1	1	144.3	15	0	12.82	0	1	0	0	116	1	0
patient33	MDR	45.5	0	4.13	0	0	0	120	1.32	42	37.5	222	0.42	0	0	0	31	1.7	0	0	0	1	11.8	1	0	0	0	13.5	28.57	1	0	4.07	0	0	0	1	1	1	141.5	5	0	8.05	0	1	0	0	134	0	0
patient34	MDR	56.3	0	5.22	0	0	0	24	1.13	67	46	219	0.37	1	0	0	33.9	4.8	0	1	1	0	11.1	1	0	0	0	14		1	0	5.7	0	0	0	0	0	1	133.5	12	0		0	0	0	0		0	0
patient35	MDR	48.8	0	2.53	0	0	0	12	1.57	49	5	261	0.02	0	0	0	27.2	2.7	0	0	0	1	10.8	1	1	0	0	11	1.1	1	0	5.51	0	0	0	0	0	0	139.3	5	0	5.93	0	0	0	1	143	0	0
patient36	MDR	73.2	0	3.33	1	0	1	6	1.59	26	31	231	0.05	1	0	0	29	3.2	0	0	0	1	9.2	0	1	0	0	13	25.83	0	0	4.47	0	0	0	0	0	1	137.3	14	1	7.44	0	0	0	0	128	0	0
patient37	MDR	74.2	0	5.99	0	0	0	60	1.07	49	24	153	0.29	1	0	0	29.6	5.5	0	1	0	1	5.9	1	0	0	1	10.8	53.8	1	1	4.26	0	0	0	0	0	1	137.8	13	0	5.68	0	0	0	0	123	1	0
patient38	MDR	61	0	4.68	0	0	0	120	0.83	58	37.5	184	0.28	0	0	0	32.2	4.8	0	0	0	1	6.7	1	0	0	0	13.1	26.74	1	1	5.35	0	0	0	0	0	0	139.1	5	0	6.54	0	1	0	10	81	0	0
patient39	MDR	38.7	0	1.98	1	0	0	8	1.04	23	38	233	0.01	0	0	0	29.9	3.1	0	0	0	1	3.7	1	0	0	0	11.2	10.41	0	0	4.43	0	0	0	0	0	0	139.2	12	1	3.45	0	0	0	0	117	0	0
patient40	MDR	62.7	1	2.84	0	0	1	8	1.2	21	37.5	154	0.05	1	0	0	33.2	3.2	0	0	0	1	8.5	0	1	1	0	12.5	17.75	0	0	3.7	0	0	0	0	0	0	139.7	3	0	3.63	0	0	0	0	92	0	0
patient41	MDR	141.4	0	2.49	0	1	0	24	0.78	51	3	212	0.04	0	0	0	25.9	9.1	0	0	0	1	6.7	1	1	0	0	10.7	0.35	1	0	6.8	0	0	0	0	0	1	133.8	20	0	4.17	0	0	0	0	114	0	0
patient42	MDR	38.2	1	7.13	0	0	0	48	1.6	61	37.5	336	0.34	0	0	0	29.9	12.7	0	0	0	1	6.2	1	0	0	0	13.1	62.33	1	1	22.64	0	0	0	0	0	0	134.6	7	0	8.08	0	0	0	0	64	1	0
patient43	MDR	44.8	1	4.52	0	0	0	72	0.52	59	41	177	2.01	0	1	0	31.7	2.8	0	1	1	1	63.2	1	1	0	1	14.1	55.51	1	0	5.3	0	0	1	1	1	1	121.5	19	0	12.37	0	1	0	0	87	0	0
patient44	MDR	11.2	0	4.4	0	0	0	240	1.26	67	34	147	0.1	0	0	0	30.5	2.3	0	0	0	1	11.7	1	1	0	0	11.9	16.73	1	0	4.4	0	0	0	1	0	0	135.3	29	1	4.94	0	0	0	0	88	1	0
patient45	MDR	108	0	2.39	1	0	1	3	0.9	27	29	275	1.31	1	0	0	30.6	4.6	0	0	1	0	10.6	1	0	0	0	10.7		0	0	3.55	0	0	0	0	0	1	130	4	0	6.74	0	1	0	0	108	0	0
patient46	MDR	77.7	0	2.2	0	1	0	2	1.13	66	6	219	0.09	0	1	0	25.4	4.3	0	0	1	1	9.7	1	1	0	1	10.4		1	0	6.41	0	0	0	0	0	1	141	29	1		0	0	0	0		0	0
patient47	MDR	77.2	0	3.54	0	0	0	240	0.59	54	37.5	106	0.09	0	0	0	29.2	4.6	0	0	0	1	7.7	1	0	0	0	11.5		1	0	4.44	0	0	0	0	0	1	141.7	10	0	3.55	0	0	0	0	82	0	0
patient48	MDR	62.7	0	3.79	0	0	1	132	1.25	48	42	131	0.25	0	0	0	30.5	4.3	0	0	0	1	12.5	1	1	0	0	13.5		1	0	4.41	0	0	0	1	1	1	136.6	13	0	7.63	0	1	0	0	115	0	0
patient49	MDR	69.3	0	3.03	1	0	0	60	0.55	73	37.5	117	0.11	0	0	0	29.1	4.2	0	0	0	1	11.1	1	0	0	0	11.8		1	0	4.71	0	0	0	0	0	1	139.7	4	0	5.63	0	0	1	0	133	0	0
patient50	MDR	17.5	0	3.88	0	0	0	12	0.39	31	29	267	0.2	0	0	0	30.6	1.9	0	0	0	1	5.7	1	0	0	0	10.7		0	0	5.26	0	0	0	0	0	1	138.4	8	0	5.14	0	0	0	0	101	1	0
patient51	MDR	66.6	0	6.72	0	1	0	180	1.66	47	28	330	0.15	0	0	0	31.6	3.9	0	0	0	1	5.3	1	0	0	1	10.6		1	0	6.38	0	0	1	0	0	1	141.3	7	0	9.23	0	0	0	0	141	0	0
patient52	MDR	60.8	1	6.72	0	1	0	120	0.88	68	37.5	160	0.92	0	0	0	34.5	3	0	0	0	1	19	1	0	0	0	11.9		1	0	5.69	0	0	0	0	0	0	140.9	17	0	8.69	0	1	0	0	142	0	0
patient53	MDR	37.5	0	4.78	0	0	1	60	1.77	57	69	652	1.11	1	0	0	27.2	3.4	0	0	0	1	10	1	0	0	0	11		1	1	4.5	0	1	0	0	0	1	122.8	2	0	10.5	0	1	0	0	85	0	0
patient54	MDR	36.8	0	6.72	0	0	0	8	1.05	69	109	520	0.47	1	0	0	30	1.6	0	1	0	1	4.3	1	0	0	0	11.5		1	0	3.66	0	0	0	0	0	1	133.6	13	0	10.62	0	0	0	0	90	0	0
patient55	MDR	95.7	0	2.61	0	0	0	12	1.19	57	3	118	0.08	1	0	0	26.9	4.5	0	0	0	1	7.5	1	0	0	1	10.4		1	1	4.23	0	0	0	0	1	1	142.6	16	0	3.82	0	1	0	0	115	0	0
patient56	MDR	98.2	0	2.25	0	0	0	36	1.13	69	2	187	0.05	1	0	0	26.4	7.2	0	0	0	1	5.8	1	0	0	0	10.3		1	0	5.06	0	0	0	0	0	1	139.9	32	0	4.26	0	0	0	0	111	0	0
patient57	MDR	46.1	0	4.08	1	0	0	2	1.21	24	14	200	0.22	0	0	0	29.3	2.4	0	0	0	1	12.8	1	1	0	0	11.1		0	0	4.64	0	0	0	0	0	0	137.1	12	0	3.62	0	0	0	0	119	0	0
patient58	MDR	40.8	0	3.51	0	0	1	168	1.11	62	37.5	263	0.3479	0	1	0	28.4	1.6	0	0	1	1	11.4	1	0	0	1			1	0	4.55	0	0	0	0	0	1	131.9	13	0	6.63	0	0	0	0	107	1	0
patient59	MDR	84.6	0	3.51	0	0	0	1	1.57	35	37.5	98	0.3479	0	0	0	28.4	4.1	0	0	0	1	11	1	1	0	1			1	0	5.52	0	0	0	0	0	1	140.3	22	0	4.44	0	0	0	0	175	0	0
patient60	MDR	68.6	0	3.94	0	0	0	12	2.19	65	37.5	275	0.15	0	0	0	30.1	7.7	0	0	0	1	9.9	1	0	0	0	10.5		1	0	4.95	0	1	0	0	0	1	139.9	25	0	9.35	0	0	0	0	133	0	0
patient61	MDR	42.2	0	3.25	0	0	0	120	0.9	75	37.5	173	0.15	1	0	0	28.5	3.8	0	0	0	1	7.1	1	0	0	0	10.6		1	0	7.54	0	1	0	0	1	0	134.2	7	0	5.51	0	1	0	0	113	0	0
patient62	MDR	74.3	0	3	0	0	0	84	1.06	66	6	256	0.85	0	1	0	26.5	4.5	0	0	1	1	12.1	1	0	0	1	11.2		1	0	4.27	0	1	0	1	1	1	141.6	8	0	7	0	1	0	0	87	0	0
patient63	MDR	44.2	1	3.98	1	0	1	3	0.85	32	12	163	0.3	0	0	0	32	1.8	0	0	0	1	4	1	0	0	0	10.9		1	0	4.26	0	0	0	0	0	0	136.8	27	0	4.68	0	0	0	0	115	0	0
patient64	MDR	86	0	4.81	0	1	1	12	1.51	54	46	278	0.3	0	0	0	26.2	7.2	0	0	0	1	9.2	0	0	0	0	11.8		1	0	3.87	1	0	0	0	0	1	141.4	7	0	7.61	1	0	0	0	104	0	0
patient65	MDR	47.7	0	5.67	0	0	0	1	1.08	60	51	272	0.31	0	0	0	27.9	3	0	0	0	1	2.8	1	0	0	0	11		1	0	4.69	0	0	0	0	0	0	139.8	38	0	5.09	0	0	1	0	100	0	0
patient66	MDR	67.7	0	4.82	0	0	0	6	0.88	53	50	163	0.13	0	0	0	27.9	4.2	0	0	0	1	11.8	1	0	0	0	11.8		1	0	3.59	0	0	0	0	0	1	137.9	10	0	7.98	0	0	0	0	109	0	0
patient67	MDR	79.8	0	2.76	0	0	0	6	0.87	51	37.5	200	0.03	0	0	0	29.6	3	0	0	0	0	10.1	1	0	0	0	10.8		1	0	5.76	0	0	0	0	0	1	137.4	153	0	3.56	0	0	0	0	123	0	0
patient68	MDR	45.3	0	1.7	1	0	1	4	0.97	25	2	172	0.04	1	0	0	27.6	2.2	0	0	0	0	4.7	1	1	0	0	12		0	0	4.81	0	0	0	0	0	0	140.1	6	1	2.14	0	0	0	0	101	0	0
patient69	MDR	89.6	0	3.51	1	0	0	2	2.25	53	2	90	0.3479	0	1	0	28.4	7	0	0	0	1	11.5	1	0	0	1		7.96	1	0	4.93	0	0	0	0	0	1	137.8	29	0	5.52	0	1	0	0	4.59	0	0
patient70	MDR	51.9	0	4.67	1	0	0	6	1.73	27	72	491	0.28	0	0	0	29.7	1.4	0	0	1	1	3.6	1	1	0	0	10.9		0	0	3.82	0	0	0	0	0	0	134.5	6	1	13.55	0	0	0	0	87	0	0
patient71	MDR	84.4	0	3.56	0	0	0	24	1.97	42	37.5	230	0.06	0	1	0	27.3	4.9	1	0	0	1	11.3	1	0	0	1	12.5		1	0	3.99	0	0	0	0	0	1	143.4	4	0	7.8	0	1	0	0	128	0	0
patient72	MDR	68.9	0	4.42	0	0	0	72	2.03	53	11	266	0.32	0	0	0	28.1	4.1	0	0	0	1	4.7	1	0	0	0	10.7		0	0	13.63	0	0	0	0	0	1	138.7	10	0	8.47	0	0	0	0	119	0	0
patient73	MDR	79.2	1	6.54	0	0	0	240	1.1	51	37.5	201	0.19	0	0	0	32.7	4.3	0	0	0	1	12.5	1	0	0	0	11.1		1	0	4.35	0	0	0	0	0	0	140.4	11	0	4.21	0	0	0	0	106	0	0
patient74	MDR	51.7	0	2.13	1	0	0	1	1.37	21	3	179	0.03	0	0	0	31	2.9	0	0	0	0	3.3	0	0	0	0	12.3		0	0	4.72	0	0	0	0	0	0	138.1	10	0	3.81	0	0	0	0	116	0	0
patient75	MDR	47.6	0	4	1	0	0	0.25	2.13	28	11	178	0.09	0	0	0	33.1	5.2	0	0	0	1	10.3	1	1	0	0	11.1		0	1	4.94	0	0	0	0	0	0	139	8	1	8.54	0	0	0	0	130	1	0
patient76	MDR	30.6	0	3.34	0	0	0	1	0.6	78	65	51	0.44	1	0	0	32.7	5.4	0	0	0	1	14.4	1	0	0	0	11.9		1	1	4.02	0	0	0	0	0	1	133.2	32	0	2.25	0	0	0	0	75	0	0
patient77	MDR	71	1	5.66	0	0	0	0.333333	1.25	51	35	353	0.14	0	1	0	27.1	4.2	0	1	0	1	21.5	1	1	0	0	10.9		1	1	13.84	0	0	0	0	0	1	136.7	19	0	7.38	0	0	0	0	127	1	0
patient78	MDR	46.8	0	1.52	0	0	0	3	1.84	21	2	235	0.06	1	0	0	32.5	2.7	0	0	0	1	10.8	1	0	0	0	12		0	0	4.37	0	0	0	0	0	0	137.9	24	0	3.57	0	0	0	0	107	1	0
patient79	MDR	62.9	0	1.9	0	0	0	5	1.98	19	37.5	213	0.04	0	0	0	29.7	2.6	0	0	0	1	10	1	0	0	0	11.3		0	0	4.29	0	0	0	0	0	0	138.4	23	0	8.07	0	0	0	0	115	0	0
patient80	MDR	78.5	0	3.95	1	0	0	84	1.12	48	28	143	0.09	0	0	0	25.9	4.5	0	0	1	1	7.3	1	0	0	0	10.6		1	0	5.81	0	0	0	0	0	1	141	11	0	4.75	0	0	0	0	142	0	0
patient81	MDR	82.8	0	5.84	0	0	0	48	1.34	60	37.5	277	0.04	0	0	0	29.3	5.4	0	0	0	1	7.1	1	0	0	1	11		1	0	4.84	0	0	0	0	0	1	140	8	0	6.12	0	0	0	0	106	0	0
patient82	MDR	47.9	1	6.54	0	0	0	48	0.87	57	37.5	229	0.13	0	1	0	30	3.5	0	0	0	1	14.2	1	0	0	1	10.8		1	1	4.49	0	0	1	0	0	1	134.3	13	0	15.35	0	0	0	0	115	0	0
patient83	MDR	82.2	0	2.54	1	0	0	0.666667	1.64	67	19	249	0.15	1	1	0	28.6	6.4	0	0	0	1	4.7	1	0	0	1	10.5		1	0	4.99	0	0	0	0	0	1	137.4	12	0	10.7	0	0	0	0	123	0	0
patient84	MDR	64.2	0	2.91	0	0	0	60	1.54	85	37.5	207	0.14	0	0	0	28.4	7.8	0	0	0	1	15.5	0	0	0	0	12.2		0	0	4.58	0	0	0	0	0	1	142.5	9	0	7.62	0	1	0	0	115	1	0
patient85	MDR	63.5	0	4.57	0	0	0	192	1.65	39	37.5	379	0.23	1	0	0	32.7	3.7	0	0	0	1	11.7	1	0	0	0	12.1		1	0	4.58	0	0	0	0	0	1	138.3	3	0	11.11	0	0	1	0	121	0	0
patient86	MDR	84.6	0	2.5	0	0	0	7	1.1	60	37.5	223	0.07	1	0	0	31.3	5	0	0	0	1	11.7	1	0	0	0	11.5		1	0	4.39	0	0	0	0	0	1	142.3	38	0	4.78	0	0	0	0	115	0	0
patient87	MDR	74.8	0	3.1	0	0	0	12	0.65	57	37.5	192	0.09	1	0	0	25.9	5.3	0	1	0	1	10.4	1	0	0	0	9.9		1	0	5.51	0	0	1	0	0	0	140.7	10	0	3.46	0	0	1	0	110	0	0
patient88	MDR	50.5	0	4.2	1	0	0	12	1.84	62	37.5	122	0.49	1	0	1	28.9	4.2	0	0	0	1	10.3	1	1	0	0	10.8		1	0	4.44	0	0	0	0	0	1	139.1	6	1	5.94	0	0	0	0	102	0	0
patient89	MDR	63.7	0	3.87	1	1	0	120	1	74	52	111	0.06	0	0	0	26.8	5.6	0	0	0	1	13	1	0	0	0	10.6		1	0	5.16	0	0	0	0	0	0	144.8	12	0	3.88	0	1	0	0	112	0	0
patient90	MDR	59.5	0	2.25	0	0	0	12	1.73	49	2	187	0.02	1	0	0	31.3	3.6	0	0	0	1	8.8	1	1	0	0	10.9		1	0	4.42	0	0	0	0	0	0	137.9	7	0	5.07	0	0	0	0	90	0	0
patient91	MDR	70.1	0	2.79	1	0	0	36	1.64	60	37.5	228	0.04	1	0	0	26.9	5.8	0	0	0	1	7.1	1	0	0	0	10.1		1	0	5.26	0	0	0	0	0	0	142.2	10	0	3.77	0	0	0	0	116	0	0
patient92	MDR	46.1	0	4.04	1	0	0	2	0.43	31	104	185	1.8	1	0	0	27.9	2.4	0	0	1	1	14.9	1	1	0	1	12		1	0	11.32	0	0	0	0	0	1	135	11	0	10.56	0	0	0	0	135	0	0
patient93	MDR	72	0	4.14	1	0	0	2	1.22	69	37.5	304	0.08	0	0	0	27.6	6.6	0	0	0	0	7.6	1	0	0	1	11.5		1	0	4.43	0	0	0	0	0	1	141.3	4	0	7.77	0	0	0	0	101	0	0
patient94	MDR	66.6	0	4.2	0	0	0	60	1.26	69	51	333	0.27	0	1	0	27.6	6.3	0	0	1	1	9.8	1	0	0	1	10.9		1	1	10.33	0	0	0	0	0	1	139.1	8	0	6.23	0	1	0	0	97	0	0
patient95	MDR	63.9	1	2.25	1	0	0	0.5	1.72	17	11	212	0.09	0	0	0	32.5	6.4	0	0	0	0	16.3	1	0	0	0	12.6		0	0	5.3	0	0	0	0	0	1	138.5	10	0	5.83	0	0	0	0	138	0	0
patient96	MDR	61.3	0	3.15	0	0	0	360	0.75	60	17	107	0.15	0	0	0	33.3	4.5	0	0	0	1	10	1	0	0	0	13.4		1	0	3.95	0	0	0	1	0	1	142.2	12	0	4.46	0	1	0	0	139	0	0
patient97	MDR	42.1	0	3.22	1	1	0	0.5	0.82	65	37.5	218	0.19	0	0	0	27.1	2.4	0	0	0	1	4	1	0	0	0	10.4		1	0	4.28	0	0	0	0	0	1	140.8	4	0	4.64	0	0	0	0	102	0	0
patient98	MDR	72.5	0	3.41	0	0	0	120	0.56	74	37.5	78	0.19	0	0	0	32.1	8.3	0	0	0	0	15.5	1	1	0	0	11.6		1	0	3.47	0	0	0	0	0	1	138.3	29	0	6.1	0	1	0	0	129	0	0
patient99	MDR	61.1	0	3.48	0	0	0	12	0.94	54	9	305	0.04	0	0	0	27.4	4.7	0	0	0	1	6.7	1	0	0	0	10.8		1	0	3.3	0	0	0	0	0	0	143.4	6	0	6.11	0	0	0	0	92	0	0
patient100	MDR	89.5	0	2.62	0	0	1	24	0.89	52	22	239	0.14	0	0	0	30.5	5.5	0	0	0	1	13.2	1	1	0	0	12.8		1	0	4.08	0	0	0	0	0	1	142.9	12	0	3.75	0	0	0	0	115	0	0
patient101	MDR	54.7	0	2.19	1	0	0	36	0.98	44	2	282	0.18	1	0	0	27.2	4.9	0	0	0	1	10.8	1	1	0	0	12.2		1	0	4.59	0	0	0	0	0	0	138.7	5	1	3.53	0	0	0	0	78	0	0
patient102	MDR	60.3	0	2.62	0	0	0	12	1.46	66	37.5	166	0.06	0	0	0	25	3.7	0	1	0	1	10.2	1	0	0	0	10.7		1	0	14.65	0	0	0	0	0	0	137	14	0	7.47	0	0	0	0	107	0	0
patient103	MDR	60.1	0	2.75	0	0	0	60	0.46	59	20	125	0.08	0	0	0	31.3	6.3	0	0	0	1	13.8	1	0	0	0	12.4		1	0	3.83	0	0	0	1	0	1	140.7	13	0	4.99	0	1	0	0	108	0	0
patient104	MDR	85.3	1	1.59	0	0	0	8	1.23	27	37.5	170	0.03	1	0	0	32.1	3.6	0	0	0	1	13	1	1	0	0	12.3		0	0	4.55	0	0	0	0	0	1	141	10	1	3.38	0	0	0	0	126	0	0
patient105	MDR	59	0	4.14	0	0	0	240	1.01	56	37.5	196	0.05	1	0	0	25.1	3.1	0	0	0	1	7.6	1	1	0	0	11.6		1	0	11.96	0	0	0	0	0	1	136.5	10	0	6.83	0	1	0	0	108	1	0
patient106	MDR	100.7	0	1.88	0	0	1	10	1.46	31	2	182	0.03	0	0	0	29.2	6.3	0	0	0	0	6.7	0	1	0	0	11.1		1	0	4.56	0	0	0	0	0	0	139	18	0	3.43	0	0	1	0	99	0	0
patient107	MDR	68.1	0	1.47	1	0	0	24	1.37	24	2	152	0.04	0	0	0	31.1	3.9	0	0	0	0	8.5	1	0	0	0	12.4		0	0	4.05	0	0	0	0	0	0	138.8	7	1	4.64	0	0	0	0	99	0	0
patient108	MDR	66	0	2.86	0	0	0	11	1.29	66	37.5	141	0.09	0	1	0	28.4	3.4	0	0	0	1	14.1	1	0	0	1	11.5		1	0	4.42	0	0	0	0	0	1	142.1	31	0	3.39	0	0	0	0	108	0	0
patient109	MDR	68.2	0	2.71	0	0	0	60	1.85	78	10	341	0.13	0	0	0	31.9	4.3	0	0	0	1	11.5	0	0	0	0	11.2		1	0	6.18	0	0	0	0	0	1	132.6	11	0	7.14	0	0	0	0	144	0	0
patient110	MDR	39.6	0	6.17	0	0	0	6	0.55	63	99	217	0.4	1	1	0	30.6	3.8	0	0	0	1	10.1	1	0	0	1	12.1		1	0	6.69	0	0	0	0	0	1	130.8	10	0	3.38	0	1	1	0	100	0	0
patient111	MDR	28.5	0	3.87	0	0	0	24	1.38	69	71	213	0.21	0	0	0	25.1	4.4	0	0	0	1	10.3	0	0	0	0	10.5		1	1	5.03	0	0	0	0	0	0	141	5	0	6.39	0	0	0	0	106	1	0
patient112	MDR	66.8	0	2.1	0	0	0	24	1.65	26	37.5	165	0.05	1	0	0	25.6	3.3	0	0	0	1	14.6	1	1	0	0	11.9		0	0	4.82	0	0	0	0	0	0	143.9	9	1	4.47	0	0	0	0	127	0	0
patient113	MDR	87.5	0	2.19	0	0	0	11	2.02	31	37.5	210	0.08	0	0	0	24.6	7	0	0	0	0	15.1	1	1	0	0	12		0	0	5.36	0	0	0	0	0	1	140.9	26	1	5.08	0	0	0	0	132	0	0
patient114	MDR	99.2	0	3.16	1	0	0	48	0.63	60	28	290	0.02	0	0	0	37.3	7.1	0	0	0	1	13.5	1	1	0	0	12.5		1	0	4.25	0	0	0	0	0	1	139.8	5	0	4.82	0	1	0	0	86	0	0
patient115	MDR	95.7	0	4.04	0	0	0	8	1.22	73	28	247	0.03	0	0	0	29.3	5.9	0	0	0	1	15.4	1	1	0	0	13.1		1	0	5.04	0	0	0	0	0	0	141.2	8	0	3.96	0	0	0	0	78	1	0
patient116	MDR	50.4	0	2.91	1	0	0	60	1.34	39	6	161	0.1	1	0	0	32.1	2.9	0	0	0	1	12.9	1	1	0	0	11.2		1	0	4.5	0	0	0	0	0	0	138.9	14	0	5.47	0	0	0	0	112	0	0
patient117	MDR	168	0	4.1	0	1	0	8	2.56	54	19	183	0.04	1	0	0	25	10	0	0	0	1	8.3	1	1	0	0	10.2		1	0	7.23	0	0	0	0	0	1	145	14	0	8.64	0	0	0	0	129	0	0
patient118	MDR	182	0	3.95	0	1	0	9	0.58	87	61	184	0.6	0	0	0	28.9	10.3	0	0	0	0	8.6	1	1	0	1	12.6		1	0	4.83	0	0	0	0	0	1	144	9	0	5.89	0	1	0	0	100	0	0
patient119	MDR	52.7	0	4.54	0	0	1	84	0.61	60	37.5	144	0.13	0	0	0	28.9	5.2	0	0	0	1	13.7	1	1	0	0	11.9		0	1	4.03	0	1	0	0	0	1	132.2	13	0	11.38	0	1	0	0	114	0	0
patient120	MDR	76.1	0	2.1	0	0	0	10	1.58	31	2	272	0.01	1	0	0	28.2	4.5	0	0	0	1	16.7	1	1	0	0	11.7		0	0	4.73	0	0	0	0	0	1	142.4	13	0	3.92	0	0	0	1	127	0	0
patient121	MDR	71.5	0	3.73	0	0	0	120	0.62	72	78	187	0.26	1	0	0	34.5	2.6	0	0	0	1	11.6	1	0	0	0	13.3		1	0	4.29	0	0	0	0	0	1	137.5	2	0	5.44	0	1	0	0	92	0	0
patient122	MDR	33.1	0	5.53	0	0	0	36	0.44	34	37.5	459	0.08	1	0	0	29.5	4.6	0	0	0	1	7.2	1	1	0	0	11.8		1	0	4.68	0	0	0	0	0	0	140	6	0	6.32	0	0	0	0	109	0	0
patient123	MDR	66.7	0	1.85	0	0	0	10	1	50	2	79	0.02	1	0	0	28.7	5.3	0	0	0	1	6.7	1	0	0	0	10.7		1	0	4.93	0	0	0	0	0	0	138.9	10	0	2.79	0	0	0	0	88	0	0
patient124	MDR	107.7	0	3.87	0	0	0	48	1.35	60	37.5	174	0.07	0	0	0	28.5	6.4	0	0	0	1	9.8	1	0	0	1	11.9		1	0	4.38	0	0	0	0	0	1	141.3	17	0	5.81	0	0	0	0	110	0	0
patient125	MDR	52.9	0	2.62	0	0	0	36	0.57	55	37.5	181	0.07	0	1	0	30.2	6	0	0	0	1	14.3	1	1	0	1	13.9		1	0	4.04	0	0	0	0	0	1	136.8	10	0	3.77	0	1	0	0	104	0	1
patient126	MDR	69.1	0	2.35	0	0	0	60	1.71	57	37.5	183	0.29	1	1	0	28.4	5.4	0	0	0	1	7.5	1	0	0	1	11.1		1	0	4.26	0	0	0	0	0	1	140.7	12	0	5.22	0	0	0	0	89	0	0
patient127	MDR	53.3	0	2.99	0	0	0	9	1.9	32	8	237	0.03	0	0	0	26.7	3.7	0	0	0	1	10.4	1	1	0	0	11.8		1	0	4.89	0	0	0	0	0	0	138.8	28	0	5.84	0	0	0	0	147	0	0
patient128	MDR	40.1	1	2.81	0	0	0	5	1.27	53	37.5	240	0.01	0	0	0	27.5	10.8	0	0	0	1	6.7	1	0	0	0	10.8		1	0	4.66	0	0	0	0	0	0	139.9	5	0	4.29	0	0	0	0	94	0	0
patient129	MDR	83	0	2.13	0	0	0	12	1.4	25	2	214	0.09	0	0	0	26.1	8.3	0	0	0	1	6.1	1	1	0	0	12.5		0	0	4.78	0	0	0	0	0	0	140.7	5	1	4.09	0	0	0	0	83	0	0
patient130	MDR	70.1	1	2.17	0	0	0	48	1.04	47	2	206	0.04	0	0	0	28.8	4.8	0	0	0	1	12.9	1	1	0	1	11.4	3.12	1	0	5	0	0	0	0	0	1	139.8	63	0	3.45	0	0	0	0	103	0	0
patient131	MDR	53.4	0	3.64	0	1	0	12	0.73	49	22	259	0.03	0	1	0	32.5	4.8	0	0	0	1	11.6	1	1	0	0	13		1	1	3.72	0	0	0	0	0	1	139.3	15	0	5.93	0	0	0	0	101	0	0
patient132	MDR	55.7	0	3.34	0	1	0	180	1.24	46	7	58	0.17	0	1	0	30	4.2	0	0	0	0	82.7	1	0	0	1	14.2		1	0	5.49	0	0	0	0	0	1	137.3	21	0	5.34	0	0	0	1	102	0	0
patient133	MDR	76.7	0	2.02	1	0	0	24	1.43	32	37.5	164	0.15	0	0	0	29.2	4.2	0	0	0	1	7.2	1	1	0	0	12.2		1	0	6.22	0	0	0	0	0	0	142	7	1	5.22	0	0	0	0	121	0	0
patient134	MDR	62	0	3.41	0	0	1	48	0.97	44	37.5	162	0.12	0	0	0	25.4	11.1	0	0	0	1	6	1	1	0	0	11.4		1	0	15.59	0	0	0	0	0	0	136.5	14	0	5.4	0	0	0	0	97	0	0
patient135	MDR	82.9	0	2.86	0	0	0	192	0.92	44	37.5	225	0.14	0	0	0	26.4	10.9	0	0	0	1	11	0	1	0	0	11.8		1	0	5	0	0	0	0	0	1	138.4	11	0	8.18	0	1	0	0	139	0	0
patient136	MDR	78.6	0	3.28	0	0	0	48	1.28	47	8	203	0.06	0	0	0	26.5	10.7	0	0	0	1	14	1	1	0	1	11.4		1	0	4.52	0	0	0	0	0	1	138.9	15	1	7.61	0	0	0	0	129	0	0
patient137	MDR	83.7	0	2.22	0	0	0	4	0.98	27	37.5	133	0.06	1	0	0	32	5.6	0	0	0	1	7.4	1	1	0	0	12.2		0	0	5.36	0	0	0	0	0	1	142.2	30	1	4.48	0	0	0	0	140	0	0
patient138	MDR	79.7	1	4.57	0	0	1	1	0.65	61	59	302	0.11	0	0	0	31.8	4.4	0	1	1	1	10.4	1	0	0	0	12.6		1	0	4.21	0	0	1	1	0	1	136.4	25	0	5.21	0	1	0	0	78	0	0
patient139	MDR	91.3	0	3.08	0	0	0	36	0.67	52	3	117	0.01	0	0	0	29.1	7.1	1	0	0	1	19.2	1	0	0	0	12.4		1	0	4.35	0	0	0	0	0	1	143.5	12	0	4.25	0	1	0	0	113	0	0
patient140	MDR	81.2	0	1.76	0	0	0	3	1.9	17	37.5	143	0.03	0	0	0	31.4	5.6	0	0	0	1	11.8	0	0	0	0	11.9		0	0	5.18	0	0	0	0	0	1	142.8	16	1	5.08	0	0	0	0	135	0	0
patient141	MDR	59.3	0	3.22	0	0	0	5	1.74	35	11	119	0.2	0	0	0	27.3	4.8	0	0	0	1	6.9	1	1	0	1	12.5		1	0	4.84	0	0	0	0	0	1	139.4	20	0	4.36	0	0	0	0	136	0	0
patient142	MDR	56.5	0	3.34	0	0	0	2	2.03	59	20	159	0.03	0	0	0	29.8	4.7	0	0	0	1	5	1	1	0	1	12.1		1	0	5.51	0	0	0	0	0	1	140.7	14	0	7.14	0	0	0	0	135	0	0
patient143	MDR	74.3	1	2.04	0	0	1	6	2.39	23	2	276	0.04	0	0	0	27.1	4.3	0	0	0	1	10.3	1	1	0	0	11.6		0	0	5.11	0	0	0	0	0	1	141.1	19	1	6.67	0	0	0	0	120	0	0
patient144	MDR	43.2	0	2.81	0	0	0	0.666667	1.35	42	37.5	254	0.02	0	0	0	28.4	5.2	0	0	0	1	8.1	1	0	0	0	12.1		1	1	5.09	0	0	0	0	0	1	143.2	16	0	6.4	0	1	0	0	110	0	0
patient145	MDR	63.1	0	2.58	0	0	0	1	2.13	39	9	283	0.06	0	0	0	32.4	6.8	0	0	0	1	10.9	0	1	0	1	11.3		1	0	5.08	0	0	0	0	0	1	141.3	25	0	6.93	0	0	0	0	123	0	0
patient146	MDR	56.9	0	3.87	0	0	0	12	1.25	58	30	254	0.08	0	0	0	26.2	6.4	0	0	0	1	12.6	1	1	0	0	11		1	0	7.65	0	0	0	0	0	0	138.6	8	0	7.35	0	0	0	0	126	0	0
patient147	MDR	57.8	0	2.16	0	1	0	120	2.07	60	2	159	0.04	1	1	0	28.6	5.7	0	0	0	1	22.9	0	1	0	1	10.6		0	0	6.27	0	0	0	0	0	1	141.2	16	0	7.55	0	0	1	0	162	0	0
patient148	MDR	83.2	1	2.58	0	0	0	9	1.96	54	37.5	246	0.13	1	0	0	29.3	7.1	0	0	1	1	16.4	1	1	0	1	12		1	0	7.45	0	0	0	0	0	1	142.5	12	0	7.1	0	0	0	0	107	0	0
patient149	MDR	58.5	0	2.07	0	0	0	120	1.04	43	37.5	164	0.03	0	0	0	26.1	5.8	0	0	0	1	16.2	1	1	0	0	11		1	0	4.57	0	0	0	0	0	1	140.8	12	0	3.83	0	0	0	0	116	1	0
patient150	MDR	54.4	0	0.78	0	1	0	72	1.6	55	37.5	265	0.57	0	1	0	23.2	6.9	0	0	0	1	9.3	1	0	1	0	8.6		1	0	12.23	0	0	0	0	0	1	138.1	27	0	7.48	0	0	0	0	126	1	0
patient151	MDR	64.6	0	2.07	0	0	0	60	1.08	47	37.5	71	0.02	0	0	0	32.8	5.3	0	0	0	1	10.2	1	0	0	0	12		1	0	4.67	0	0	0	0	0	0	142	3	0	4.36	0	1	0	0	100	1	0
patient152	MDR	62.8	0	2.19	0	0	1	84	0.72	66	10	174	0.1	0	0	1	26	10.1	0	0	1	1	8.3	1	1	0	0	11.7		1	0	5.83	0	0	0	1	0	0	137	23	0	5.67	0	1	0	0	72	1	0
patient153	MDR	47.4	0	3.78	0	0	0	240	0.3	72	37.5	170	0.74	0	0	0	25.7	10.1	0	0	0	1	8	1	0	0	0	11.8		1	0	5.91	0	0	0	0	0	1	141.2	8	0	12.08	0	1	0	0	147	0	0
patient154	MDR	61.3	0	1.41	1	0	0	24	0.88	52	8	189	0.03	0	0	0	29.4	6.4	0	0	0	1	9.4	1	1	0	0	10.3		1	0	6.04	0	0	0	0	0	0	140.4	16	1	4.87	0	0	0	0	118	0	1
patient155	MDR	64.3	0	1.47	1	0	0	18	1.89	50	2	171	0.04	1	1	0	29.1	4.5	0	0	0	1	14.6	0	1	0	1	11.6		1	0	14.57	0	0	0	0	0	1	137.9	12	0	6.95	0	0	0	0	143	0	0
patient156	MDR	63.9	0	4.34	1	0	0	96	1.02	32	61	320	0.11	0	0	0	28.9	3.6	0	0	0	1	5.3	1	1	0	0	12.1		0	0	5.12	0	0	0	0	0	1	141.8	10	1	6.82	0	0	1	0	127	0	0
patient157	MDR	50.2	0	4.95	0	0	0	60	0.3	70	80	184	1.06	0	1	0	31	3.1	0	0	0	1	10.1	1	0	0	1	13.6		1	1	4.28	0	0	0	0	0	1	133.3	12	0	4.72	0	1	0	0	114	0	0
patient158	MDR	52.8	0	2.79	1	0	0	96	0.77	61	21	230	0.15	0	0	0	26.9	4.8	0	0	0	1	5.3	1	0	0	0	10.9		1	0	4.65	0	0	0	0	0	1	138.3	7	0	4.89	0	1	0	0	119	0	0
patient159	MDR	57.8	0	4.94	0	0	0	240	0.5	59	37.5	192	0.02	0	0	0	25.6	2.4	0	0	0	1	6.3	1	1	0	0	11.7		1	0	10.45	0	0	0	0	0	1	139.4	10	0	4.78	0	1	0	0	75	0	0
patient160	MDR	41.6	0	4.1	0	0	0	240	0.84	60	42	368	0.14	0	0	0	30.2	3	0	0	1	1	13	1	0	0	0	11.7		1	0	4.93	0	0	0	0	0	1	141.5	5	0	12.22	0	1	0	0	132	0	0
patient161	MDR	83.7	0	2.91	0	0	0	12	1.69	32	37.5	213	0.02	1	0	0	31.6	4.8	0	0	0	1	9	1	1	0	0	11.8		1	0	4.1	0	0	0	0	0	1	139.2	7	1	9.08	0	0	0	0	108	0	0
patient162	MDR	74.2	0	2.5	0	0	0	1	1.5	23	12	219	0.02	0	0	0	29.2	5	0	0	0	1	8	1	0	0	0	11.5		0	0	4.41	0	0	0	0	0	1	138.9	22	1	6.24	0	0	0	0	149	1	0
patient163	MDR	62.5	0	2.38	1	0	0	5	0.96	48	31	124	0.15	1	0	0	35	5	0	0	1	1	15	1	1	0	0	12.9		1	0	4.38	0	0	0	0	0	1	132.4	74	0	7.22	0	0	0	0	127	0	0
patient164	MDR	115.1	1	2.19	0	0	0	10	2.48	30	37.5	183	0.02	0	0	0	30.5	7.3	0	0	0	1	19.8	1	1	0	0	11.1		1	0	3.88	0	0	0	0	0	1	139.9	26	1	6.74	0	0	0	0	151	0	0
patient165	MDR	71.4	0	3.9	1	0	0	24	0.86	44	26	213	0.04	1	0	0	31.9	4.3	0	0	0	1	15.3	1	0	0	0	10.4		1	0	4.81	0	0	0	0	0	1	134.7	11	0	4.98	0	0	0	0	141	0	0
patient166	MDR	75.7	0	2.97	1	0	0	240	0.72	66	37.5	123	0.46	0	0	1	31.9	5.6	0	0	0	1	12.2	1	0	0	0	14.1		1	0	3.96	0	1	0	0	0	1	140.5	16	0	3.44	0	1	0	0	82	0	0
patient167	MDR	63.1	0	4.54	0	0	0	180	1.41	56	49	429	0.18	1	0	0	30.8	2.5	0	0	1	1	5.4	1	1	0	1	11.2		1	1	4.81	0	0	0	1	0	1	138.1	2	0	10.16	0	1	0	0	120	0	0
patient168	MDR	78.6	0	4.94	0	0	0	60	0.39	60	71	355	0.12	0	0	0	30.1	6.4	0	0	0	1	7.6	1	0	0	0	12.2		1	0	4.88	0	0	0	0	0	1	137.4	6	0	5.57	0	1	0	0	90	0	0
patient169	MDR	53.6	0	2.02	1	0	0	1	2.07	32	2	184	0.07	0	0	0	30.8	3.9	0	0	0	1	7.4	0	1	0	0	12		1	0	4.82	0	0	0	0	0	0	138.7	6	1	4.77	0	0	0	0	122	0	0
patient170	MDR	72.7	0	2.19	0	1	0	24	0.85	71	37.5	141	0.11	0	0	1	27.5	3.3	0	0	0	1	13.5	0	1	0	0	10.6		1	0	8.52	0	0	0	0	0	1	138.3	16	0	5.32	0	0	1	0	137	0	0
patient171	MDR	49.9	0	3.9	0	0	0	1	1.04	57	30	205	0.36	0	0	0	26.2	3.7	0	1	0	1	5.7	1	0	0	1	11.3		1	0	4.09	0	0	0	0	0	1	141.6	17	0	5.93	0	1	0	0	107	0	1
patient172	MDR	55.6	0	3.7	0	0	0	48	0.61	65	48	231	0.06	0	0	0	24.4	6.2	0	0	0	1	11.5	1	1	0	0	11		1	0	10.93	0	0	0	0	0	1	139.1	9	0	7.08	0	0	0	0	131	1	0
patient173	MDR	546.5	0	5.84	0	0	0	60	0.33	68	37.5	187	1.32	1	0	0	34	33.3	0	0	1	1	10.1	1	1	0	0	14.4		1	0	4.71	0	0	0	0	0	1	137.2	18	0	6.31	0	1	1	0	59	0	0
patient174	MDR	79.6	0	2.58	0	0	0	204	0.91	59	29	138	0.09	0	0	0	25.4	5.5	0	0	0	1	16.2	1	0	0	0	11.6		1	0	5.43	0	0	0	0	0	0	141.6	8	0	4.3	0	1	0	0	132	0	0
patient175	MDR	143.2	1	1.89	0	1	0	1	0.17	74	87	122	0.31	0	0	0	27.6	13.6	0	0	0	1	10.4	1	1	0	0	10.8		1	0	4.19	0	0	0	1	0	1	133.8	13	0	4.88	1	1	0	0	100	0	0
patient176	MDR	71.3	0	4.57	0	0	1	144	0.37	58	44	230	0.32	1	0	0	26.3	4.6	0	0	0	1	10.1	0	0	0	0	11.9		1	0	4.39	0	0	0	0	0	1	138.4	7	0	3.67	0	1	0	0	105	0	0
patient177	MDR	42	0	3.1	0	0	0	12	0.44	64	36	269	1.29	0	0	1	28.9	1.7	0	0	0	1	22	1	1	0	0	11.8		1	0	5.13	0	0	0	0	0	1	126.6	20	0	10.35	0	1	0	0	88	0	0
patient178	MDR	32.5	0	4.14	0	0	0	60	0.51	65	49	271	0.2	1	1	0	28.9	4	0	0	0	1	16	1	0	0	1	12.1		1	0	3.31	0	1	0	0	0	1	133.8	28	0	11.34	0	1	0	0	116	0	0
patient179	MDR	71.1	0	3.49	0	0	0	192	0.72	52	37.5	354	0.17	0	0	0	30.1	5.3	0	0	0	1	5.1	1	1	0	1	11.3		1	0	5.17	0	0	0	1	0	1	138.9	7	0	10.75	0	1	0	0	125	0	0
patient180	MDR	68.9	1	3.28	1	0	0	12	1.15	38	37.5	149	0.17	0	0	0	27.3	5.1	0	0	0	0	10.9	1	1	0	0	11.8		1	0	4.62	0	0	0	0	0	0	140.6	9	1	8.16	0	1	0	0	125	0	1
patient181	MDR	56.6	0	1.61	0	0	0	228	1.13	64	37.5	161	0.06	0	0	0	27.6	4.2	0	0	0	1	16.5	1	1	0	0	11.9		1	0	4.38	0	0	0	0	0	0	142.8	11	1	2.74	0	0	0	0	90	1	0
patient182	MDR	69.4	0	3.21	0	0	0	10	0.26	74	37.5	196	0.16	1	0	1	30.6	5.6	0	0	0	1	10.5	1	0	0	1	10.2	25.16	1	0	4.36	0	0	0	0	0	1	135.7	10	0	4.95	0	0	1	0	105	1	0
patient183	MDR	85.6	0	3.78	0	0	0	10	0.79	36	37.5	116	0.03	1	0	0	31	7.5	0	0	0	1	13.2	1	0	0	0	11.2		1	0	4.87	0	0	0	0	0	1	141.7	23	0	8.26	0	0	0	0	113	0	0
patient184	MDR	111.1	0	2.66	0	0	0	480	0.96	76	37.5	120	0.05	0	0	0	29.5	6.9	0	0	0	1	9.9	1	0	0	0	11.6		1	0	2.25	0	0	0	0	0	1	142.1	7	0	4.15	0	1	0	0	99	0	0
patient185	MDR	60	0	2.66	0	0	0	12	1.37	41	+	239	0.04	1	0	0	29.6	5	0	0	0	1	5	1	1	0	0	11.5		1	1	4.19	0	0	0	0	0	0	140.2	12	0	4.62	0	0	0	0	99	0	0
patient186	MDR	52.8	0	3.04	1	0	1	12	1.3	33	37.5	113	0.07	0	0	0	31.6	5.1	0	0	1	1	7.5	1	1	0	0	11.8		1	0	4.28	0	0	0	1	1	0	140	13	0	3.89	0	1	0	0	105	0	0
patient187	MDR	40.3	1	4.24	0	0	1	12	1.01	40	68	120	0.76	1	0	0	27.4	1.9	0	0	0	1	15.1	1	1	0	0	12.4		1	0	5.31	0	0	0	0	0	0	135.9	4	0	5.2	0	0	0	0	89	0	0
patient188	MDR	60.5	0	1.99	0	0	0	12	1.01	61	39	126	0.02	1	0	0	27.2	4	0	0	0	1	6.6	1	1	0	0	12.4		1	0	4.95	0	0	0	0	0	0	139.9	6	0	4.19	0	0	1	0	88	0	0
patient189	MDR	74.2	0	3.15	0	0	0	36	1.78	72	37.5	151	0.03	1	0	0	28.3	8.1	0	0	0	1	8.1	1	0	0	0	11		1	0	4.81	0	0	0	0	0	0	140.3	16	0	5.26	0	0	0	1	124	0	0
patient190	MDR	42.6	0	3.34	0	0	0	72	0.88	28	37.5	99	0.14	0	0	0	29.8	4.7	0	0	0	1	8.2	1	1	0	0	12.5		0	0	3.73	0	0	0	0	0	0	137.2	7	0	6.07	0	1	0	0	88	0	0
patient191	MDR	87.2	0	1.42	0	0	0	9	1.64	25	37.5	191	0.04	1	0	0	27.3	6.8	0	0	0	1	8.7	1	1	0	0	11.8		0	0	4.14	0	0	0	0	0	1	141.9	20	1	5.18	0	0	0	0	124	0	0
patient192	MDR	56.4	0	2.13	1	0	0	24	1.25	68	16	194	0.09	1	1	0	25.1	6.4	0	0	0	0	9.7	1	0	0	1	10.6		1	0	6.39	0	0	0	0	0	1	140	26	0	5.98	0	0	0	0	131	0	0
patient193	MDR	83.2	0	3.87	0	0	0	2	1.02	72	37.5	223	1.77	0	0	0	27.9	4.5	0	1	0	1	17.8	1	1	0	0	12.7		1	0	5.44	0	0	0	0	0	1	138	4	0	5	0	0	0	0	77	0	0
patient194	MDR	81.4	0	3.62	0	0	0	6	1.2	60	37.5	79	0.01	0	0	0	22.5	6	0	0	0	1	13.5	1	0	0	0	11.3		1	0	4.27	0	0	0	0	0	0	139.4	3	0	3.38	0	0	0	0	103	0	0
patient195	MDR	60.2	0	4.31	0	0	0	48	1	54	20	208	0.02	0	0	0	36.2	5.5	0	0	0	1	6.7	1	1	0	1	12		1	0	4.26	0	0	0	0	0	1	144.5	4	0	6.97	0	0	0	0	136	0	0
patient196	MDR	98.9	0	1.9	0	0	0	12	1.38	22	37.5	182	0.03	0	0	0	30.2	8.4	0	0	0	1	8.1	0	0	0	0	11.6		0	0	5.46	0	0	0	0	0	1	141.1	7	0	4.83	0	0	1	1	132	0	0
patient197	MDR	62.36	1	3.51	0	0	0	1	1.13	23	37.5	219	0.3479	1	0	0	28.4	5.2	0	0	0	1		1	0	0	0			0	1		0	0	0	0	0	0			1		0	0	0	0		0	0
patient198	MDR	53.3	1	2.31	0	0	1	36	1.41	60	37.5	181	0.16	0	0	0	25.8	4.8	0	1	0	1	13.1	1	0	0	0	11.5	5.04	1	1	4.22	0	0	0	0	0	0	144.7	2	0	5.25	0	0	0	0	126	0	0
patient199	MDR	45	0	2.65	0	0	0	12	0.85	53	8	59	0.3	1	0	0	32.8	4	0	0	0	1	12.9	1	0	0	0	12.6	15.04	1	0	4.91	1	0	0	0	0	0	140.3	13	0	6.1	0	0	1	0	108	0	0
patient200	MDR	110.6	0	3.12	1	1	0	10	0.54	59	3	209	0.15	1	0	0	26.7	11.7	0	0	0	1	8.8	0	1	0	0	11.4	2.25	1	0	2.89	0	1	0	0	0	0	140.8	6	0	4.86	0	1	0	0	73	0	0
patient201	MDR	80.3	1	2.54	0	0	0	120	1.2	31	37.5	192	0.03	1	0	0	29.3	4.3	0	0	0	1	8.2	1	1	0	0	10.9		1	0	4.31	0	0	0	1	0	1	139	11	1	6.04	0	0	0	0	140	0	0
patient202	MDR	55.3	0	2.19	1	0	0	108	2.03	45	5	210	0.05	1	0	0	28.1	5.4	0	0	0	1	7.1	1	1	0	0	11.5		1	0	3.96	0	0	0	0	0	0	139.5	10	1	5.47	0	0	0	0	120	0	0
patient203	MDR	34.4	0	3.69	0	0	0	20	0.55	50	61	227	0.74	0	0	0	30.3	1.6	0	0	1	1	12.7	1	1	0	0	11.7	109.14	1	1	10.15	0	0	0	0	0	1	130.4	14	0	11.62	0	1	0	0	102	0	0
patient204	MDR	52.2	0	3.4	0	0	0	20	2.23	49	13	146	0.05	0	0	0	28.9	4	0	0	0	1	12.9	1	1	0	0	10.4	6.86	1	0	5.61	0	0	0	0	0	1	141.3	12	0	7.34	0	0	0	0	137	0	0
patient205	MDR	55	1	2.45	0	0	0	12	0.8	53	6	120	0.34	0	0	0	32.7	3.1	1	0	0	1	11	1	1	0	0	10.7	28.67	1	0	4.89	0	0	0	0	0	0	140.5	23	0	6.56	0	0	0	0	100	0	1
patient206	MDR	64.6	0	3.4	1	0	0	168	0.89	39	22	104	0.02	1	0	0	33.9	4.1	0	0	0	1	7.6	1	1	0	0	12.3	11.78	1	0	4.4	0	0	0	1	0	1	139.8	11	0	4.07	0	1	0	0	117	0	0
patient207	MDR	102.3	0	3.54	0	1	0	240	0.4	71	39	113	0.15	0	0	0	27.6	4.6	0	0	0	1	14.1	1	0	0	0	12	117.91	1	1	4.82	0	0	0	0	0	1	140	15	0	4.58	0	0	0	0	101	0	0
patient208	MDR	51.4	0	1.79	1	0	0	24	1.49	56	2	149	0.06	1	0	0	30.6	4.6	0	0	0	1	13	1	0	0	0	12	3.21	1	0	4.57	0	0	0	0	0	0	138.4	20	0	3.45	0	0	0	0	111	0	0
patient209	MDR	422.9	0	5.38	0	1	0	240	0.52	61	37.5	250	0.49	1	0	0	31	21.2	0	0	0	1	4.7	1	0	0	1	10.1	121.29	1	1	7.03	0	0	1	1	1	1	138.5	5	0	11.77	0	1	0	0	79	0	0
patient210	MDR	55.7	0	3.33	0	0	0	24	2.98	85	37.5	295	0.15	0	0	0	32.2	3.6	0	0	0	1	11.2	1	1	0	0	12.5	12.77	1	0	4.58	0	0	0	0	0	0	142.5	4	0	5.62	0	0	0	0	135	0	0
patient211	MDR	71.1	0	2.93	0	0	0	36	0.77	39	17	161	1.18	0	0	0	25.6	4	0	0	0	1	20.6	1	1	0	0	14.5	11.17	1	0	4.78	0	0	0	1	1	1	140.7	45	0	4.29	0	1	0	0	122	0	0
patient212	MDR	68.6	0	1.34	0	0	0	2	2.14	78	2	272	0.5	1	0	0	27.6	5	0	0	0	1	12.4	1	0	0	1	13.2	6.86	1	0	3.69	0	0	0	0	0	1	142.4	11	0	8.24	0	0	0	0	83	0	0
patient213	MDR	46.8	0	1.93	0	0	0	24	1.29	72	3	135	0.1	0	0	0	26.5	3.6	0	0	0	1	6.5	1	0	0	0	12.1	1.55	1	0	3.69	0	0	0	0	0	0	139.8	6	0	3.3	0	0	0	1	100	0	0
patient214	MDR	40.5	0	1.48	0	0	0	2	1.44	31	2	173	0.01	0	0	0	29.9	2.1	0	0	1	0	11.6	1	1	1	0	12.9	0.75	1	0	4.2	0	0	0	0	0	0	140.6	191	1	4.39	0	0	0	0	107	0	0
patient215	MDR	72.1	0	1.85	0	0	0	8	1.43	39	2	220	0.03	1	0	0	25.1	7.4	0	0	0	1	5.1	1	0	0	0	12.3	1.46	1	0	5.22	0	0	0	0	0	1	142.5	9	1	3.26	0	0	1	0	133	1	0
patient216	MDR	51.8	1	5.67	0	0	0	120	1.28	56	37.5	193	0.15	0	0	0	26.7	8.6	0	0	0	0	13	1	0	0	0	12	34.08	1	1	4.33	0	0	0	0	0	0	139.8	13	0	7.2	0	1	0	0	94	1	0
patient217	MDR	38.9	0	5.22	0	0	0	24	0.78	53	56	226	0.14	0	0	0	26.5	2.7	0	0	1	1	10.4	1	0	0	0	10.9	49.13	1	0	5.79	0	0	0	0	0	1	137.3	11	0	4.54	0	1	0	0	101	1	0
patient218	MDR	73	0	3.54	0	0	0	240	0.93	73	8	157	0.09	0	0	0	26.4	4.4	0	0	1	1	14	1	1	0	1	11.5	10.84	1	1	5.15	0	0	0	0	0	1	139.6	4	0	4.96	0	0	0	0	87	0	0
patient219	MDR	67.8	0	2.57	0	0	0	24	2.08	42	37.5	196	0.02	0	1	0	30.1	10.5	0	0	0	1	4	1	0	0	1	14.2	12.82	1	0	4.29	0	0	0	0	0	1	140.2	6	0	6.38	0	0	0	0	107	0	0
patient220	MDR	104.8	0	0.77	0	0	0	48	0.25	68	37.5	122	1.26	0	0	0	34.2	17.6	0	0	0	0	26.9	1	0	0	0	11.2	27.88	1	1	5.23	0	0	0	1	1	1	135.9	179	0	11.44	0	1	0	0	131	0	0
patient221	MDR	108	1	1.98	1	0	0	12	1.53	44	2	234	0.04	1	1	0	28.9	4.8	0	0	0	0	13.4	1	1	0	1	10.1	2.02	1	0	6.51	0	0	0	0	0	1	141.8	30	0	6.03	0	1	0	0	145	0	0
patient222	MDR	57.6	0	5.67	1	0	1	240	0.37	53	29	177	0.2	0	0	0	31.2	10.6	0	0	1	1	10.1	1	0	0	1	12.5	139.61	1	0	16.2	0	1	0	1	1	1	127.2	6	0	10.56	0	1	0	0	58	0	0
patient223	MDR	47.9	0	3.33	0	0	0	360	0.37	51	37.5	246	0.13	0	0	0	25	4.8	0	0	0	1	7	1	0	0	0	10.9	117.59	1	0	5.26	0	0	0	1	0	0	139.1	12	0	4.76	0	1	0	0	101	0	0
patient224	MDR	76	0	2.28	0	0	0	60	0.9	71	3	167	0.04	0	0	0	27	5.5	0	0	0	1	10.2	1	1	0	0	10.6	1.71	1	0	4.81	0	0	0	0	0	1	137.2	11	0	4.03	0	0	0	0	125	1	0
patient225	MDR	82	0	2.74	0	0	0	36	1.36	37	37.5	117	0.05	0	0	0	31.3	4.8	0	0	0	1	12	1	1	0	1	11.9	14.97	1	0	4.57	0	0	0	0	0	1	140.4	18	0	6.26	0	0	0	0	125	1	0
patient226	MDR	61.8	0	3.06	1	0	0	24	2.15	30	3	190	0.11	0	0	0	26.9	3.9	0	0	0	1	15.8	0	1	0	0	11.6	8.35	0	0	4.71	0	0	0	0	0	1	137.8	15	1	6.56	0	0	1	0	152	0	0
patient227	MDR	70.9	0	4.4	0	0	0	36	0.91	53	24	353	0.17	0	0	0	33	4.6	0	0	0	1	13.4	1	1	0	0	13.2	40.99	1	1	4.48	0	0	0	0	0	1	139.8	8	0	7.91	0	0	0	0	114	0	0
patient228	MDR	47.5	0	2.73	0	0	1	4	1.71	49	15	313	0.12	0	0	0	27.7	3.3	0	0	0	1	10.1	1	0	0	0	12.6	16.05	1	1	4.57	0	0	0	0	0	0	141.2	4	0	5.63	0	0	0	0	116	0	0
patient229	MDR	76.3	0	2.39	0	0	0	36	1.23	46	2	178	0.03	0	0	0	28.1	5.3	0	0	0	1	14.3	1	0	0	0	11.9	14.3	1	0	4.64	0	0	0	0	0	1	141.9	3	0	4.36	0	1	0	0	134	0	0
patient230	Normal	55.7	1	7.58	0	0	0	1	0.75	74	69	292	0.25	1	0	0	32.8	4.6	0	0	1	1	10.1	1	0	0	0	12.8	28.42	1	0	4.15	0	0	0	0	0	1	138.3	12	0	5.95	0	0	0	0	88	0	0
patient231	Normal	31.6	0	5.08	0	1	0	2	0.66	55	40	221	0.69	1	0	0	35.5	3.3	0	1	0	1	11.5	1	1	0	0	12.6	144.31	1	1	13.17	0	0	0	0	0	1	131.7	20	0	10.71	0	1	0	0	101	0	0
patient232	Normal	81.4	0	1.81	1	0	0	0.1	1.14	24	2	113	0.08	0	0	0	27.4	4.4	0	0	0	0	8.7	0	1	0	0	11.3	0.64	0	1	4.61	0	0	0	0	0	0	140.3	8	1	4.81	0	0	0	0	117	0	0
patient233	Normal	45.1	0	1.92	0	0	0	7	0.82	47	5	141	0.06	0	0	0	26.9	2.7	0	0	0	1	7.5	1	0	0	0	13.3	0.74	1	0	4.97	0	0	0	0	0	0	141.9	2	0	3.05	0	0	0	0	87	0	0
patient234	Normal	63.3	1	3.4	0	1	0	1	0.71	76	41	265	0.91	0	0	1	29.6	3.6	0	0	0	1	7.1	1	0	0	0	13.8	44.18	1	0	5.01	0	0	0	0	0	1	130.6	2	0	6.13	0	0	0	0	71	0	0
patient235	Normal	45.2	0	2.38	0	0	0	156	1.36	45	5	230	0.04	0	0	0	25.9	4.3	0	0	0	1	13.1	1	1	0	0	10.7	11.1	1	1	4.83	0	0	0	1	0	1	137.7	1	1	6.71	0	1	1	0	133	1	0
patient236	Normal	85.7	1	5.38	1	0	0	2	0.9	59	43	329	0.15	0	0	0	25.4	5.2	0	0	0	1	10.9	1	0	0	1	10.6	25.29	1	0	5.24	0	0	0	0	0	1	136.8	2	0	5.87	0	1	0	0	90	0	0
patient237	Normal	41.6	0	2.03	0	0	0	1	2.01	21	2	213	0.05	0	0	0	28.1	3.5	0	0	0	0	6.6	0	1	0	0	11.6	2.54	0	0	5.11	0	0	0	0	0	0	139.8	31	0	3.59	0	0	0	0	126	0	0
patient238	Normal	61.7	1	4.81	1	1	0	1	1.13	50	26	188	0.17	0	0	0	27.1	4.7	1	0	1	1	10.3	1	1	0	0	11.5	10	1	0	11.77	0	0	0	0	0	1	137.7	14	0	4.48	0	0	0	0	141	0	0
patient239	Normal	50.9	1	6.72	0	0	0	1	0.51	86	35	337	1.2	1	0	0	26.5	2.2	0	0	0	1	11.3	1	0	0	0	11	154.44	1	0	4.68	0	0	0	0	0	0	138.7	15	0	10.16		1	0	0	101	0	0
patient240	Normal	48	1	3.25	0	0	1	360	0.45	79	52	255	3.68	1	1	0	29.4	4.2	0	0	0	1	12.5	1	0	0	0	12.2	20.24	1	0	4.88	0	0	0	0	0	1	137.3	10	0	3.44	0	0	0	0	100	0	0
patient241	Normal	84.6	0	2.19	1	0	0	12	1.27	34	7	179	0.1	0	0	0	30.6	2.8	0	0	0	1	6.5	1	1	0	0	10.5	2.17	1	0	4.76	0	0	0	0	0	1	139.4	11	0	4.91	0	0	0	0	130	0	0
patient242	Normal	41.8	0	4.18	0	0	0	120	0.87	76	30	214	0.18	0	0	0	24.7	2.8	0	0	0	1	5.4	0	0	0	0	10.8	13.19	1	1	17.07	0	0	0	0	0	1	141.6	14	0	4	0	0	0	0	103	1	0
patient243	Normal	62.1	0	3.25	1	0	0	3	0.85	50	37.5	170	0.15	0	0	0	27.4	3.7	0	0	1	1	12.4	1	1	0	0	11.2	6.13	1	0	5.88	0	0	0	0	0	1	141.8	7	0	4.09	0	0	1	0	133	0	0
patient244	Normal	72.1	0	5.99	0	0	0	72	1.02	48	58	253	0.21	0	0	0	27	3.5	0	0	0	1	10.9	1	0	0	0	11.8	103.69	1	1	17.27	0	0	0	0	0	1	137.3	16	0	7.09	0	0	0	0	120	0	0
patient245	Normal	51.8	1	4.52	0	1	0	2	1.66	73	45	203	0.13	0	0	0	26.2	4.6	0	0	0	1	6.9	1	1	0	0	11.5	6.37	1	1	6.07	0	0	0	0	0	0	141	42	0	4.82	0	0	0	0	112	0	0
patient246	Normal	53.4	1	5.67	0	0	0	300	1.52	80	47	325	0.88	0	0	0	30.8	2.3	0	0	0	1	13	1	1	0	1	11.7	43.12	1	1	5.97	0	0	0	0	0	1	138	14	1	7.34	0	0	0	0	113	0	0
patient247	Normal	46.3	0	1.7	1	0	0	12	1.17	28	2	196	0.02	0	0	0	26.8	2.6	0	0	0	1	10.4	1	1	0	0	11.2	1.38	0	0	5.02	0	0	0	0	0	0	135.9	45	1	3.98	0	0	0	0	111	0	0
patient248	Normal	63.7	0	7.13	0	0	0	4	0.85	69	27	258	0.17	1	1	0	27	5.5	0	0	0	1	4.8	1	0	0	1	11.9	36.86	1	0	8.84	0	0	0	0	0	1	139.5	6	0	7.52	0	0	0	0	110	0	0
patient249	Normal	42.2	0	4.68	1	0	0	12	1.22	53	26	223	0.16	0	0	0	27.6	4.3	0	0	0	1	5.2	1	1	0	0	11.5	10.93	1	0	5.07	0	0	0	0	0	0	138.1	10	0	6.23	0	1	0	0	126	0	0
patient250	Normal	65.9	0	3.88	0	1	0	0.666667	1.79	68	2	183	0.13	0	0	0	29.1	5.5	0	0	0	0	11.3	1	0	0	1	10.6	4.1	1	0	5.79	0	0	0	0	0	1	142	11	0	6.01	0	1	0	0	127	0	0
patient251	Normal	40.2	0	3.21	1	0	0	5	2.08	24	2	216	0.03	0	0	0	28.3	3.5	0	1	1	1	7.7	1	1	0	0	11.2	1.1	0	0	4.63	0	0	0	0	0	0	139.8	10	1	6.97	0	0	1	0	128	0	0
patient252	Normal	53.8	1	2.38	1	0	0	3	1.84	27	4	238	0.09	1	0	0	27.1	3.2	0	0	0	1	15.2	1	1	0	0	12	1.52	0	0	4.76	0	0	0	0	0	0	141.3	5	1	3.8	0	0	0	0	127	0	0
patient253	Normal	77.6	0	3.79	0	0	0	5	0.38	87	4	156	0.09	0	0	0	29.9	5.3	0	0	1	1	7	1	0	0	0	11.9	27.2	1	0	5.14	0	0	0	0	0	1	141.6	5	0	2.82	0	0	0	0	114	0	0
patient254	Normal	49.3	0	4.68	1	0	0	2	0.76	66	15	267	0.15	0	0	0	29.1	5.1	0	0	0	1	7.6	1	0	0	1	11.4	21.86	1	0	5.65	0	0	0	0	0	1	141.4	14	0	4.67	0	0	0	0	130	0	0
patient255	Normal	57	0	2.49	0	0	0	2	1.24	21	37.5	171	0.08	1	0	0	25.7	4.2	0	0	0	1	3.7	1	0	0	0	10.9	2.08	0	0	4.37	0	0	0	0	0	0	141.3	6	1	5.3	0	0	0	0	114	0	0
patient256	Normal	50.8	0	3.51	0	1	0	2	1.85	69	37.5	173	0.3479	0	0	0	28.4	5.2	0	0	1	1	11.9	1	0	0	0		3.16	1	1	5.03	0	0	0	0	0	0	140.9	17	0	4.73	0	1	0	0	125	0	0
patient257	Normal	57.3	1	3.79	1	0	0	2	2.9	58	37.5	449	0.07	1	0	0	26.7	3.3	0	1	0	1	6.2	0	0	0	0	11.6	30.7	1	0	6.81	0	0	0	0	0	0	141.5	8	0	8.18	0	0	0	0	119	0	0
patient258	Normal	64.4	0	3.88	1	0	0	0.133333	1.66	24	17	289	0.63	0	0	0	31.1	6.4	0	0	0	1	3.4	1	1	0	1	12	28.97	0	0	4.48	0	0	0	0	0	1	143.1	11	0	9.56	0	0	0	0	123	1	0
patient259	Normal	73.1	0	3.06	0	0	0	0.25	1.05	74	3	75	0.16	0	0	1	31.3	4.9	0	0	0	1	12.7	1	0	0	0	11.4	12.74	1	0	5.53	0	0	0	0	0	1	140.2	12	0	4.53	0	0	0	0	126	0	0
patient260	Normal	41.5	0	1.88	1	0	0	2	1.33	68	2	141	0.1	1	0	0	27.9	2.5	0	0	0	0	10.6	1	0	0	0	9.7	1.29	1	0	4.99	0	0	0	0	0	0	139.2	12	0	3.39	0	0	0	0	116	0	0
patient261	Normal	41.9	0	4.65	1	0	0	2	1.79	57	33	270	0.6	1	0	0	26.7	5.6	0	0	0	0	7.9	1	0	0	0	10.2	27.81	1	0	5.7	0	0	0	0	0	0	142	8	0	7.32	0	0	0	0	95	0	0
patient262	Normal	100.3	0	4.18	0	0	0	6	0.67	84	52	237	0.98	1	0	0	30.6	6	0	1	0	1	11.2	1	0	0	1	11.9	46.71		1	3.58	0	0	0	0	0	1	136.2	2	0	5.68	0	1	0	0	79	0	0
patient263	Normal	57.2	0	2.25	1	0	0	12	2.05	47	5	174	0.01	1	0	0	29	3.1	0	0	0	1	13.2	1	1	0	0	11.9	28.71	1	0	5.14	0	0	0	0	0	1	141.4	29	0	7	0	0	0	0	140	0	0
patient264	Normal	67.9	0	2.01	1	0	0	8	1.24	26	3	159	0.03	0	0	0	28.2	4	0	0	0	1	11.1	1	1	0	0	10.9	1.01	0	0	5.06	0	0	0	0	0	1	140.4	19	1	3.99	0	0	0	0	144	0	0
patient265	Normal	48.2	0	3.25	1	0	0	3	1.09	26	12	197	0.09	0	0	0	26.9	3.9	0	0	0	1	6.1	1	1	0	0	10.7	1.72	0	0	4.83	0	0	0	0	0	0	139.6	14	0	4.09	0	0	0	0	132	0	0
patient266	Normal	87.4	1	7.58	0	1	0	24	0.65	61	40	126	0.18	0	1	0	34.8	4	0	0	0	1	21.3	1	1	0	0	13.4	25.18	1	1	7.84	0	0	0	0	0	1	132	20	0	5.03	0	0	0	0	117	0	0
patient267	Normal	38.9	0	7.13	0	0	0	9	1.27	71	23	248	0.28	0	1	0	30.8	3.8	0	0	0	1	11.8	1	0	0	1	11.5	38.81	1	0	4.44	0	0	0	0	0	1	141.4	13	0	6.67	0	0	0	0	131	0	0
patient268	Normal	56.7	0	2.45	1	0	0	2	1.13	51	4	228	0.11	0	0	0	26.3	4.9	0	0	0	0	10.3	1	1	0	0	9.9	1.84	1	0	5.12	0	0	0	0	0	1	140.3	27	0	3.53	0	0	1	0	129	0	0
patient269	Normal	72.6	0	3.15	0	1	0	0.5	0.77	77	26	270	0.24	0	0	1	26.5	4.3	0	0	1	1	8.4	1	0	0	1	11.3	41.2	1	1	6.22	0	0	0	0	0	1	141.2	9	0	4.48	0	0	0	0	105	0	0
patient270	Normal	51.5	1	2.69	0	0	0	36	1.43	32	23	318	0.09	0	0	0	27.6	3.1	0	0	0	1	6.1	1	1	0	0	11.1	5.26	0	0	5.82	0	0	0	0	0	0	137	15	0	4.68	0	0	0	0	102	0	0
patient271	Normal	62.2	0	2.42	0	0	0	6	1.42	75	37.5	197	0.16	1	0	0	25.1	4.9	0	0	0	1	6.6	0	1	0	0	11.9	3.21		0	5.4	0	0	0	0	0	1	139	12	0	3.25	0	0	1	0	116	0	0
patient272	Normal	103.6	0	4.08	0	1	0	24	1.03	83	37.5	213	0.2	0	0	1	27.5	6.9	0	0	0	1	11.9	1	0	0	0	10.9	11.79	1	0	5.91	0	0	0	0	0	1	140.4	18	0	5.66	0	0	0	0	127	0	0
patient273	Normal	40	0	2.84	1	0	0	0.25	1.78	29	11	236	0.13	0	0	0	27.1	3.1	0	0	0	0	10.3	1	1	0	0	10.4	1.89	1	0	6.46	0	0	0	0	0	0	138	17	0	4.18	0	0	1	0	120	0	0
patient274	Normal	62.6	1	3.03	0	1	0	8	0.98	75	3	210	0.07	1	0	0	29.5	3.1	0	1	0	0	10.1	1	1	0	1	11.3	1.84	1	0	5.28	0	0	0	0	0	1	138.4	12	0	6.26	0	0	0	0	117	0	0
patient275	Normal	36.7	1	6.34	1	1	0	3	0.93	52	19	175	0.17	0	0	1	23.4	1.7	0	0	0	1	10.3	1	1	0	0	12.3	1.71	1	0	4.18	0	0	0	0	0	0	140.6	5	0	2.58	0	0	0	0	104	0	0
patient276	Normal	60.1	0	4.18	0	1	0	24	1.75	50	12	248	0.07	1	0	0	25.9	3.9	0	0	0	1	14.4	1	1	0	0	10.8	6.87	1	1	12.49	0	0	0	0	0	1	140	14	0	5.68	0	0	0	0	144	0	0
patient277	Normal	35.3	1	5.06	0	0	0	24	0.2	72	35	229	0.2	1	0	0	26.3	3.8	0	0	1	1	5	1	0	0	1	12.1	101.77	1	0	12.52	0	0	0	0	1	1	138.2	13	0	6.21	0	1	0	0	103	0	0
patient278	Normal	70.6	0	2.46	0	0	0	12	1.42	55	2	156	0.04	0	0	0	28.7	5.3	0	0	0	0	11.7	0	1	0	0	10.8	2.31	1	0	4.92	0	0	0	0	0	1	141.7	19	1	5.14	0	0	0	0	135	0	0
patient279	Normal	50.9	0	2.69	1	0	0	2	1.44	50	9	173	0.25	0	0	0	23.9	4.3	0	0	0	1	11.5	1	0	0	0	10.9	2.4	1	0	5.47	0	0	0	0	0	0	139.8	121	0	3.94	0	0	0	0	122	0	0
patient280	Normal	38.8	0	4.18	1	0	0	0.333333	0.85	77	37.5	240	1.77	0	0	0	26.8	3.1	0	0	1	1	10.1	0	0	0	0	11.5	3.75	1	0	11.49	0	0	0	0	0	0	138.2	11	0	4.44	0	0	1	0	125	0	0
patient281	Normal	42.7	0	6.34	0	0	0	120	0.85	67	34	194	0.1	0	0	0	28.7	3.4	0	0	1	1	5.8	1	1	0	1	10.8	22.66	1	0	6.96	0	0	0	0	0	1	139.1	19	0	7.16	0	1	0	0	125	0	0
patient282	Normal	55.6	0	2.83	1	0	0	6	0.79	29	3	174	0.05	1	0	0	29.5	4.6	0	0	0	1	10.3	1	1	0	0	12.3	7.31	0	0	4.21	0	0	0	0	0	1	139.1	13	0	3.28	0	0	0	0	114	0	0
patient283	Normal	50.3	1	4.18	1	1	0	1	1.05	78	37.5	239	0.19	0	0	0	27.3	6.5	0	0	0	1	5.9	1	1	0	0	11.7	26.75	1	0	6.36	0	0	0	0	0	0	137.4	11	0	6.86	0	0	0	0	103	0	0
patient284	Normal	44.5	0	5.22	1	1	0	2	1.33	72	34	282	0.23	1	0	0	27.7	3.3	0	0	0	1	6.2	1	1	0	0	12.3	29.98	1	0	5.06	0	0	0	0	0	0	141.1	16	0	5.33	0	0	0	0	104	0	0
patient285	Normal	40.9	1	3.54	1	0	0	0.25	0.35	78	26	124	0.61	0	0	1	31.6	2.7	1	0	1	1	14.7	1	0	0	1	12.5	50.73	1	0	5.05	0	0	0	0	1	1	133.8	2	0	4.46	0	1	0	0	85	0	0
patient286	Normal	51.6	1	2.73	1	0	0	0.333333	1.05	76	22	271	0.55	0	1	0	22.4	5.1	0	0	1	1	13.9	1	0	0	0	11.2	2.28	1	0	4.57	0	0	0	0	0	1	133.3	12	0	11.96	0	1	0	0	110	0	0
patient287	Normal	55.3	0	3.39	0	0	0	36	0.98	74	26	213	0.23	1	0	0	27	4.1	1	1	0	0	13.5	1	0	0	0	11.4	4.71	1	0	4.94	0	0	0	0	0	0	137.8	5	0	10.09	0	1	0	0	116	0	0
patient288	Normal	32.3	0	5.08	0	1	0	0.0166667	1.47	81	37.5	171	0.19	0	0	0	28.9	6.5	0	0	0	1	11.8	0	0	0	1	12.5	45.98	1	1	9.95	0	0	0	0	0	1	135.3	26	0	10.17	0	0	0	0	121	1	0
patient289	Normal	56.7	1	3.94	0	0	1	1	0.33	65	5	106	21.54	0	0	0	31.4	6.3	0	0	0	1	18.1	1	1	0	0	15.6	129.48	1	0	6.11	0	0	0	1	1	1	136	8	0	22.97	0	1	0	0	51	0	1
patient290	Normal	72.8	0	2.95	1	0	0	0.1	1.21	36	3	249	0.1	0	0	0	30.9	4.6	0	0	0	0	10	0	1	0	0	9.7	1.2	1	0	4.02	0	0	0	0	0	1	139	114	1	6.23	0	0	1	0	145	0	0
patient291	Normal	50.5	0	4.52	0	0	0	11	0.93	53	20	150	0.12	0	1	0	28	3.6	0	0	0	1	13.2	0	1	0	0	11.7	17.73	1	0	6.29	0	0	0	0	0	1	135.7	11	0	11.81	0	0	0	0	135	1	0
patient292	Normal	49.1	0	3.88	0	0	0	24	0.75	53	48	174	0.19	1	0	0	28.2	3.6	0	0	0	1	10.9	1	1	0	0	11.1	10.8	1	0	5.75	0	0	0	0	0	1	138.5	11	0	3.2	0	1	0	0	104	0	0
patient293	Normal	70.5	1	3.71	0	1	0	1	0.85	78	34	262	1.5	1	0	0	26.2	2.9	0	0	0	1	10.4	1	0	0	0	10.8	55.91	1	1	13.38	0	1	0	0	0	1	138.5	33	0	13.71	0	1	0	0	77	0	0
patient294	Normal	46.5	0	3.61	0	1	0	12	1.71	53	21	268	0.08	1	0	0	27.5	2.8	0	0	0	1	10.5	1	0	0	1	11.1	18.78	1	0	5.1	0	0	0	0	0	1	139.8	29	0	6.18	0	0	0	0	120	0	0
patient295	Normal	60.4	0	3.77	1	0	1	1	1.13	31	66	330	0.15	0	0	0	35.9	3.7	0	0	0	1	12.1	0	1	0	1	13.2	53.17	1	0	4.21	0	0	1	0	0	1	136.4	18	1	10.32	0	0	0	0	112	0	0
patient296	Normal	67.1	0	3.54	0	0	1	1	0.84	72	18	189	0.49	0	1	0	25.8	3	0	0	0	0	7	1	1	0	1	11.1	1.55	1	0	4.72	0	0	0	1	0	1	140.5	12	0	15.56	0	1	0	0	100	0	0
patient297	Normal	41	0	0.94	1	0	0	36	1.29	60	32	203	0.23	0	1	0	23.4	1.7	0	0	0	1	10.9	0	0	0	1	10.8		0	0	4.51	0	0	0	0	0	1	110.1	11	0	13.58	0	0	0	0	105	1	0
patient298	Normal	38.1	1	4.68	0	0	1	1	0.65	28	38	270	0.68	0	0	0	32	2.4	0	1	1	1	13	1	1	0	1	13.3	24.19	0	1	4.66	0	0	0	1	0	1	132.7	13	0	4.03	0	1	0	0	75	0	0
patient299	Normal	104.8	0	0.97	0	0	0	18	0.36	83	10	102	0.74	0	0	0	38.1	7.6	0	0	0	1	30	1	0	0	0	16.5	10.18	1	0	5.41	0	0	0	0	0	1	132.4	21	0	2.26	0	0	0	0	78	0	0
patient300	Normal	58.3	0	2.39	0	0	0	0.333333	1.47	35	2	258	0.09	0	0	0	28.5	5.3	0	0	0	0	13.1	1	1	0	0	11	1.19	1	0	4.12	0	0	0	0	0	1	140	13	0	5.56	0	0	1	0	145	0	0
patient301	Normal	57.7	1	4.65	0	0	0	12	0.62	70	52	202	0.14	0	1	0	35.8	2.5	0	0	1	1	14	1	0	0	1	12.3	53.08	1	0	5.23	0	0	0	1	0	1	134.3	10	0	5.88	0	1	0	0	108	0	0
patient302	Normal	78.8	0	3.94	0	0	0	12	0.75	28	44	318	0.1	1	0	0	28.3	4.6	0	0	1	1	11	1	1	0	0	11.8	12.27	0	0	5.12	0	1	0	0	0	1	139	13	1	2.85	0	0	0	0	123	1	0
patient303	Normal	62	1	3.25	1	0	0	12	1.4	48	28	190	0.13	0	0	0	28.2	3.4	0	0	1	1	5.6	1	1	0	1	10.6	10.32	1	0	12.51	0	0	0	0	0	1	138.3	11	0	5.11	0	0	0	0	126	0	0
patient304	Normal	51.5	0	2.45	0	1	0	240	1	67	3	213	0.09	1	0	0	28.8	4.3	0	0	0	1	11.1	1	1	0	0	11.3	2.63	1	0	5.92	0	1	0	0	0	1	137.3	20	0	4.08	0	0	0	0	130	0	0
patient305	Normal	114.1	0	3.79	0	0	0	8	0.75	88	43	197	0.52	0	1	0	30.7	4.8	0	0	0	1	11.9	1	1	0	1	11.7	15.88	1	0	4.44	0	0	0	0	0	1	139.7	14	0	4.71	0	0	1	0	98	0	0
patient306	Normal	46.4	0	3.51	1	0	0	2	1.14	37	5	208	0.3479	0	0	0	28.7	4.2	0	0	0	1	7.9	1	0	0	0		15.38	1	0	4.82	0	0	0	0	0	0	137.9	12	0	5.42	0	0	0	0	119	0	0
patient307	Normal	75.2	1	3.88	0	0	0	3	0.69	52	37.5	335	0.09	0	0	0	26.4	2.8	0	0	0	1	4.5	1	1	0	0	11	12.42	1	0	5.08	0	0	0	0	0	1	137.9	12	0	5.84	0	0	0	0	120	0	0
patient308	Normal	47.2	0	3.77	0	0	0	240	1.2	42	16	221	0.1	1	0	0	27.3	4.5	0	0	0	1	6.6	1	0	0	0	12.2	15.23	1	0	4.46	0	0	0	0	0	1	139.7	15	0	5.9	0	1	0	0	119	0	0
patient309	Normal	35.9	0	7.58	0	1	0	0.0666667	1.25	65	37.5	572	0.17	0	1	1	30.7	2.3	0	0	0	1	12.2	1	1	0	1	13.4	110.26	1	1	4.54	0	0	0	1	1	1	136.6	8	0	14.27	0	1	1	0	101	1	0
patient310	Normal	55	1	5.99	1	0	0	2	0.81	36	38	319	0.15	0	0	0	27.3	2.8	0	1	0	1	12.4	1	1	0	0	12.7	50.94	1	0	4.79	0	0	0	0	0	0	137.8	4	0	5.41	0	0	0	0	105	0	0
patient311	Normal	37	0	3.54	0	0	0	12	0.6	91	56	173	0.71	1	1	0	31.6	3.2	0	0	1	1	11.7	1	0	0	1	11.9	43.08	1	1	4.99	0	0	0	1	0	1	129.2	10	0	5.92	0	1	0	0	100	0	0
patient312	Normal	63.6	1	2.53	0	0	0	6	1.37	24	8	192	0.07	1	0	0	28.4	3.6	0	1	0	0	13.5	1	1	0	0	11.3	3.72	0	0	4.17	0	0	0	0	0	1	139.4	13	1	6.46	0	0	0	0	117	0	0
patient313	Normal	38.7	0	4.52	1	0	0	10	1.19	70	85	417	1.74	1	0	0	26	3.1	0	0	0	1	9.5	0	0	0	0	11.5	31.19	1	0	5.14	0	0	0	0	0	0	140.1	4	0	3.7	0	1	0	0	72	0	0
patient314	Normal	85.2	0	2.49	1	0	0	0.666667	1.85	26	2	223	0.03	1	0	0	28.5	5.9	0	0	0	0	7.5	1	1	0	0	10.3	20.03	0	0	4.95	0	0	0	0	0	1	138.3	20	1	6.26	0	0	1	0	145	0	0
patient315	Normal	34.1	0	3.88	1	0	0	1	0.46	68	45	245	0.47	1	0	0	25	3	0	0	0	1	6.6	0	0	0	0	11.5	51.37	1	0	5.46	0	0	0	0	0	0	138	10	0	2.96	0	0	1	0	102	0	0
patient316	Normal	43.1	0	4.4	1	1	0	0.5	1.23	68	60	271	0.14	0	0	0	21.8	1.9	0	0	0	1	4.7	1	0	0	0	10.6	25.58	1	1	6.55	0	0	0	0	0	0	139.5	12	0	6.02	0	1	0	0	128	0	0
patient317	Normal	62.9	0	4.34	1	1	0	2	1.35	68	22	267	0.2	0	1	0	27.1	2.8	0	0	0	1	10.9	1	1	0	1	11.7	12.06	1	0	4.82	0	0	0	0	0	1	142.3	18	0	5.35	0	0	0	0	129	0	0
patient318	Normal	72.5	1	4.92	0	0	0	3	0.62	64	41	216	0.19	1	1	0	26.4	3.9	0	0	0	1	7.1	1	0	0	1	11.5	17.56	1	1	5.24	0	0	0	1	0	1	137	11	0	4.95	0	1	0	0	131	0	0
patient319	Normal	65.6	0	2.69	0	0	0	3	2.87	58	2	156	0.08	0	0	0	30.5	5.1	0	0	0	0	9.5	0	1	0	1	10.1	2.38	1	0	7.66	0	0	0	0	0	1	142.2	16	0	8.37	0	0	0	0	142	0	0
patient320	Normal	55.7	0	2.88	1	0	0	3	1.79	27	14	181	0.02	0	0	0	26.8	3.5	0	0	0	1	12.4	1	1	0	0	11.5	2.34	0	0	4.44	0	0	0	0	0	0	138.2	12	1	4.31	0	1	0	0	115	0	0
patient321	Normal	43	0	5.22	1	0	0	6	1.14	67	31	329	0.24	1	0	0	29.9	3.4	0	0	0	1	7.2	1	0	0	1	12.3	23.22	1	1	4.26	0	0	0	0	0	1	138.6	12	0	6.02	0	0	0	1	118	0	0
patient322	Normal	63.4	0	3.86	0	0	0	72	1.39	32	11	210	0.27	0	0	0	27	4.3	0	0	0	1	5.8	0	1	0	0	11.5	22.84	1		4.44	0	0	0	0	0	1	139.9	12	0	5.2	0	0	1	0	148	0	0
patient323	Normal	64.8	0	2.65	0	0	0	0.25	1.15	29	18	209	0.04	0	0	0	31.5	4.1	0	0	0	1	13.6	1	1	0	0	11.9	15.9	0	0	3.64	0	0	0	0	0	1	139.8	10	0	4.89	0	0	0	0	128	0	0
patient324	Normal	42.7	0	4.78	1	0	0	24	1.03	71	43	234	0.13	0	0	0	27.1	2.6	0	0	0	1	10.3	1	0	0	0	11.7	37.53	1	0	3.86	0	0	0	0	0	0	139.7	4	0	5.42	0	1	0	0	105	0	0
patient325	Normal	46.4	1	3.88	0	0	0	0.25	1.06	27	21	185	0.28	0	0	0	24.8	2.8	0	0	0	1	4.9	1	1	0	0	12	42.75	1	0	4.31	0	0	0	0	0	0	140.2	12	0	4.59	0	0	0	0	105	1	0
patient326	Normal	45.1	1	5.38	0	0	0	1	1.45	66	86	514	1.38	1	0	0	28.9	2.5	0	0	0	1	5.5	1	0	0	0	11.3	75.94	1	1	4.55	0	0	0	1	0	1	135.6	19	0	10.11	0	0	1	0	107	0	0
patient327	Normal	50.3	1	5.22	0	0	0	0.25	1.4	18	74	352	0.57	0	0	0	28.8	3.8	0	0	0	1	4.8	1	1	0	1	13.2	1.28	0	0	4.07	0	0	0	0	0	1	137.4	14	0	12.31	0	0	0	0	108	0	0
patient328	Normal	37.6	0	4.34	1	0	0	6	1.62	53	27	178	0.04	1	0	0	31.6	4	0	0	1	1	4.8	1	0	0	0	11.5	29.4	1	0	4.34	0	0	0	0	0	1	138.2	8	0	5.61	0	1	0	0	123	0	0
patient329	Normal	55	0	2.23	1	0	0	0.666667	1.76	43	5	248	0.05	1	0	0	29.6	2.8	0	0	0	1	4.2	1	1	0	0	11.8	2.39	1	0	5	0	0	0	0	0	1	139.9	17	0	5.9	0	0	0	0	143	1	0
patient330	Normal	78.9	0	1.94	1	0	0	0.333333	1.64	42	2	161	0.05	0	0	0	27.9	5.1	0	0	0	1	13.5	0	1	0	0	11.7	2.16	1	0	3.88	0	0	0	0	0	1	141.3	22	0	5.41	0	0	0	0	133	0	0
patient331	Normal	32.8	0	2.39	0	1	0	15	0.9	67	49	213	0.69	1	1	0	31	4.1	0	0	0	1	8.6	1	0	0	1	11.5	39.31	1	0	4.44	0	0	0	0	0	1	135.8	14	0	3.94	0	0	0	0	80	0	0
patient332	Normal	47.4	0	4.52	0	0	0	108	0.47	62	95	136	0.04	1	0	1	32.5	2.9	0	0	1	1	15.9	1	0	0	0	11.6	17.33	1	0	4.05	0	0	0	0	0	1	132.9	10	0	4.43	0	1	0	0	112	0	0
patient333	Normal	77.4	0	1.96	1	0	0	5	1.64	22	2	204	0.05	1	1	0	28.5	3.6	0	0	1	0	7.6	1	0	0	1	11.5		0	0	4.38	0	0	0	0	0	1	141.7	12	1	10.46	0	0	0	0	144	0	0
patient334	Normal	102.4	1	6.34	0	0	0	0.133333	0.3	56	27	130	0.33	0	0	0	31.9	2.3	0	1	0	1	13.7	0	1	0	1	12.3	232.04	1	0	3.75	0	0	0	1	0	1	132.9	12	0	10.24	0	0	0	0	119	1	0
patient335	Normal	46.5	0	6.72	0	0	0	0.25	0.41	72	81	277	1.27	0	1	0	30.5	4.4	0	0	0	1	10.1	1	0	0	1	13.2	113.89	1	1	4.64	0	0	0	0	0	1	131.4	13	0	8.48	0	1	0	0	101	0	0
patient336	Normal	48.4	0	3.32	0	0	0	720	0.75	83	24	194	0.17	1	0	1	28.1	3.9	0	0	0	1	10.2	1	1	0	0	11.9	21.79	1	0	4.36	0	1	0	1	0	1	132.5	10	0	3.93	0	1	0	0	100	1	0
patient337	Normal	50.3	0	5.22	0	1	0	12	0.82	82	37.5	384	0.3	1	1	0	29.6	4.1	0	0	0	1	10.9	1	0	0	1	12.1	115.89	0	1	5.14	0	0	0	1	1	1	135.5	15	0	6.53	0	1	0	0	100	0	0
patient338	Normal	51.9	1	2.79	0	0	0	24	1	55	8	191	0.05	1	1	0	26.3	4.3	0	0	1	1	8.5	1	1	0	1	11	13.93	1	0	5.49	0	0	0	0	0	1	141.4	37	1	5.76	0	1	0	0	136	0	0
patient339	Normal	47.3	1	2.45	1	0	0	60	1.92	48	2	329	0.1	0	1	0	30.6	5	0	0	0	1	7	1	0	0	0	10.9	1.81	1	0	5.73	0	0	0	0	0	1	141.7	11	0	4.73	0	1	0	0	136	0	0
patient340	Normal	40.1	0	4.4	1	0	0	24	1.48	55	52	215	0.52	0	0	0	26.5	5.9	0	1	0	1	4.9	1	0	0	0	10.1	3.81	1	0	11.28	0	0	0	0	0	1	141.9	21	0	5.56	0	0	0	0	114	0	0
patient341	Normal	41.5	1	3.51	0	0	0	2	0.61	78	37.5	246	0.3479	1	0	0	28.7	4.8	0	1	1	1	11.8	1	0	0	0		10.7	1	0	4.32	0	0	0	0	0	0	142.5	11	0	4.47	0	1	0	1	104	0	0
patient342	Normal	58.9	0	4.44	0	0	0	300	1.12	81	37.5	168	0.11	1	0	0	23.4	6.3	0	0	0	1	13.3	1	1	0	0	12.7		1	0	4.51	0	0	0	0	0	1	139.1	17	0	5.42	0	0	0	0	106	1	0
patient343	Normal	46.2	0	3.98	0	0	0	2	0.86	60	39	183	1.06	1	1	0	29.1	3.7	0	1	0	1	10.6	1	0	0	0	10.9	59.56	1	1	14.23	0	0	0	0	1	1	136.3	4	0	4.77	0	1	0	0	103	0	0
patient344	Normal	23.1	1	4.92	0	0	0	24	0.39	82	55	490	0.66	0	0	0	25.1	2.9	0	0	0	1	10.8	1	0	0	0	12.4	41.82	1	1	7.58	0	0	0	1	1	0	135	11	0	16.85	0	1	0	0	103	0	0
patient345	Normal	55.3	0	3.21	0	1	0	0.5	0.79	74	12	193	0.22	1	0	1	27.1	5.5	0	0	0	1	10.9	1	1	0	0	12.4	5.74	1	0	5.34	0	0	0	0	0	1	139.3	20	0	4.13	0	0	0	0	110	0	0
patient346	Normal	59.9	1	4.92	1	0	0	1	0.65	66	25	15	0.57	0	0	0	29.1	3.4	0	0	0	1	15.2	1	1	0	0	12.4	44.39	1	0	16.13	0	0	0	0	0	1	135.7	26	0	2.17	0	1	0	0	60	0	0
patient347	Normal	39	0	3.62	1	1	0	0.133333	0.76	73	30	223	0.17	0	0	0	26.8	5.7	0	0	0	1	12.1	1	0	0	0	11.1	7.92	1	0	4.87	0	0	0	1	0	0	141.7	11	0	7.48	0	0	0	0	126	1	0
patient348	Normal	70.7	1	2.53	1	0	0	2	1.01	21	4	155	0.38	0	0	0	26.5	4.2	0	0	0	1	5.4	0	0	0	0	10.8	12.7	0	0	5.02	0	0	0	0	0	1	139.3	31	1	4.49	0	0	0	0	141	0	0
patient349	Normal	38.8	0	3.39	1	0	0	12	1.13	32	14	282	0.09	0	0	0	26.7	2.9	0	0	0	1	3.9	1	1	0	0	10.5	13.57	0	0	4.4	0	0	0	0	0	0	138.9	4	0	5.12	0	1	0	0	124	0	0
patient350	Normal	77.6	0	3.54	1	0	1	2	0.81	68	71	236	3.34	1	0	0	30.9	6.2	0	0	0	1	5.7	1	0	0	0	11.5	34.35	1	0	4.7	0	0	0	0	0	1	139	25	0	4.33	0	0	0	0	100	0	0
patient351	Normal	44.7	0	4.56	1	0	0	6	1.42	27	85	327	0.48	1	1	0	34.7	2.7	0	0	0	1	4.6	1	1	0	1	11.6	18.54	0	0	4.67	0	0	0	0	0	1	138.8	34	0	6.84	0	1	0	0	122	0	0
patient352	Normal	36	0	5.47	0	0	0	6	1.22	38	73	271	0.15	1	0	0	30.5	3.6	0	0	0	1	3.8	1	1	0	0	11.8	29.8	1	0	4.72	0	0	0	0	0	0	141	12	0	6.86	0	0	0	0	102	1	0
patient353	Normal	32.8	0	3.94	0	0	0	0.1	1.06	20	38	210	0.05	0	0	0	28.7	3.2	0	0	0	0	5.7	1	0	0	0	11.9	23.27	0	1	4.92	0	0	0	0	0	0	137.5	22	1	3.84	0	0	0	1	100	1	0
patient354	Normal	34.7	0	3.94	1	0	0	2	1.07	77	37.5	358	0.1	1	0	0	29.3	4.8	0	0	0	0	10.6	1	0	0	0	11.3	17.45	1	0	5.16	0	0	0	0	0	0	137.1	18	0	6.75	0	0	0	0	113	0	0
patient355	Normal	53.8	1	4.29	1	0	0	0.233333	1.78	24	45	317	1.09	0	0	0	29.5	3.1	0	0	0	0	4.8	0	1	0	0	12.3	10.94	0	1	5.5	0	0	0	0	0	1	139	10	0	6.82	0	0	1	0	134	0	0
patient356	Normal	45.2	1	4.4	0	0	0	24	1.13	59	48	215	0.35	0	1	0	26.4	4.8	0	0	0	1	11.1	1	1	0	1	11.2	17.98	1	1	8.82	0	0	0	1	0	1	135.3	14	0	6.01	0	0	0	0	124	0	0
patient357	Normal	62.6	0	3.47	0	0	0	0.233333	1.53	24	24	206	0.08	0	1	0	28.1	4.4	0	0	1	1	4.6	1	1	0	1	10.6	21.02	0	0	5.78	0	0	0	0	0	1	140.2	18	1	5.96	0	0	1	0	139	0	0
patient358	Normal	144.9	0	3.54	0	1	0	2	0.43	67	60	211	1.69	1	1	1	28.1	18.2	0	0	1	1	10.1	1	1	0	1	11.3	54.44	1	0	12.12	0	0	0	0	1	1	141.3	232	0	4.31	0	1	0	0	76	0	0
patient359	Normal	18.7	0	5.22	0	0	0	60	0.85	40	80	176	0.32	1	0	0	27.3	2.8	0	0	1	1	5.8	1	0	0	0	11.8	51.79	1	0	4.61	0	0	0	1	0	1	137.5	4	0	10.65	0	1	0	0	110	0	0
patient360	Normal	34	0	2.16	0	0	0	120	1.07	51	17	282	0.06	0	0	0	26.8	3.7	0	0	0	1	6.8	1	1	0	0	10.7	36.14	0	0	4.78	0	0	0	0	0	0	139	20	0	7.92	0	1	0	0	100	0	0
patient361	Normal	45.1	0	4.18	1	1	0	2	0.92	79	39	153	1.17	1	0	0	26.2	2.9	0	0	0	0	11.3	1	0	0	1	11	110.94	1	1	4.58	0	0	0	0	0	1	135.2	10	0	12.23	0	1	0	0	111	0	0
patient362	Normal	71.3	0	3.12	0	1	0	24	0.83	79	27	188	0.08	1	1	0	25.6	4.9	0	0	0	1	13.5	1	0	0	0	10.6	6.25	0	0	4.74	0	0	0	0	0	1	141.5	7	0	4.26	0	0	0	0	117	0	0
patient363	Normal	75.6	1	2.08	0	0	0	0.25	0.51	83	37.5	130	0.62	0	1	0	31.7	5.4	0	0	0	1	36.9	0	0	0	1	12.1	19.44	1	0	5.35	0	0	0	0	0	1	137.4	32	0	1.93	0	0	0	0	84	0	0
patient364	Normal	37.4	1	4.78	0	0	0	0.666667	1.1	54	71	195	0.36	1	1	0	27.4	3	0	0	0	1	12.1	1	1	0	1	10.5	51.34	1	1	14.3	0	0	0	0	0	1	134.4	17	0	4.78	0	0	0	0	113	0	0
patient365	Normal	31.3	0	5.38	0	0	0	2	0.15	17	64	114	0.36	0	0	0	29.3	2.9	0	0	0	1	13.4	0	0	0	0	11.5	163.77	0	1	5.13	0	0	0	0	0	1	131.4	1123	0	3.58	0	0	0	0	112	0	0
patient366	Normal	33.2	1	4.4	0	0	0	2	0.98	26	37.5	270	0.24	1	0	0	29.3	3.3	0	0	0	1	5.4	1	1	0	0	11	16.7	0	1	4.33	0	0	0	0	0	1	140	11	1	6.95	0	1	0	0	141	0	0
patient367	Normal	34.9	1	3.98	0	0	0	0.666667	0.97	17	37.5	315	0.18	0	0	0	29	4.7	0	0	0	0	5	1	0	0	0	11.9	29.26	0	0	4.28	0	0	0	0	0	1	137.4	20	0	10.08	0	0	0	0	102	0	0
patient368	Normal	39.9	0	4.08	0	1	0	6	0.49	63	99	180	0.56	1	0	0	23.7	1.1	0	0	0	1	15.4	1	1	0	0	11.4	164.19	1	1	3.66	0	1	0	0	1	0	138	19	0	15.23	0	1	0	0	92	0	0
patient369	Normal	34.6	0	1.86	0	0	0	2	1.35	30	15	157	0.04	1	0	0	27.6	1.8	0	1	1	1	13.4	1	1	0	0	11.9	3.38	1	0	4.67	0	0	0	1	0	0	136.8	10	0	5.33	0	0	0	0	103	1	0
patient370	Normal	34.8	1	2.54	1	0	0	3	0.31	73	78	210	1.03	1	1	0	27.1	2.6	0	0	1	1	12.4	1	1	0	1	9.3	34.27	1	0	4.13	0	0	0	0	1	1	136.3	10	0	3.04	0	1	0	0	86	0	0
patient371	Normal	64	1	4.18	1	0	0	2	1.29	26	15	159	0.19	1	1	0	27	2.8	0	1	0	1	6.3	1	1	0	0	11.4	26.05	0	0	4.06	0	0	0	0	0	1	141.3	10	1	6.16	0	0	1	0	130	0	0
patient372	Normal	40.8	1	3.47	0	0	0	0.25	0.53	53	40	59	0.34	0	0	0	29.8	2.9	1	0	0	1	11.7	0	1	0	0	10.6	107.87	1	1	5.38	0	0	0	0	0	1	130	32	0	3.03	甲泼尼龙	0	0	0	52	0	0
patient373	Normal	42.5	1	2.69	0	1	0	12	0.96	86	92	384	0.51	1	0	0	29.2	1.3	0	0	0	0	10.7	1	0	0	0	12.3	56.7	1	0	5.27	0	0	0	0	1	0	136.4	5	0	6.38	0	1	0	0	95	0	0
patient374	Normal	81.6	0	2.69	0	0	0	0.666667	1.58	54	10	197	0.07	0	0	0	29.6	3	0	0	0	1	15	1	1	0	1	11.6	2.62	1	0	4.44	0	0	0	0	1	1	139.5	23	0	4.89	0	1	0	0	106	0	0
patient375	Normal	114.7	0	4.08	1	0	0	1	0.62	78	29	135	0.22	0	0	1	30.8	10.4	0	0	0	1	12.2	1	0	0	0	13.2	23.4	1	0	4.5	0	0	0	0	0	1	138.9	4	0	2.86	0	0	0	0	105	0	0
patient376	Normal	50.4	0	1.67	0	0	0	4	0.84	51	37.5	115	0.09	1	0	0	29	2.7	0	0	0	1	19.3	1	1	0	0	12	2.06	0	0	3.93	0	0	0	0	0	0	140.9	13	0	2.86	0	0	0	0	113	0	0
patient377	Normal	26	1	1.5	0	0	0	24	0.4	74	65	115	0.58	1	1	0	31.5	10.2	0	0	0	1	24.8	1	0	0	1	12.9	107.25	1	0	2.74	0	0	0	0	1	1	127.7	20	0	13.08	0	0	0	0	109	0	0
patient378	Normal	30	0	2.46	0	0	0	6	1.38	48	47	307	0.19	1	0	0	28.3	4.3	0	0	0	0	10.8	1	1	0	1	11.3	52.36	1	1	6.44	0	0	0	1	0	1	137	9	0	4.99	0	1	0	1	109	1	0
patient379	Normal	59.1	0	2.93	0	0	0	1	1.26	23	61	321	0.18	1	0	0	29.6	3.5	0	0	0	1	7.3	1	1	0	1	12.1	49.51	0	0	4.6	0	0	0	1	0	1	138.1	10	0	4.79	0	0	0	0	122	0	0
patient380	Normal	27.6	1	3.54	0	0	0	1	0.76	69	73	169	1.56	1	1	0	31.9	1.9	1	1	0	1	10.6	1	0	0	1	12.9	37.36	1	0	4.11	0	0	0	0	0	1	131.4	11	0	10.64	0	0	0	0	74	0	1
patient381	Normal	39.1	0	3.47	1	1	1	84	1.22	57	25	286	0.05	0	1	0	25.4	2.2	0	0	0	1	5.5	0	1	0	1	10.3	12.63	1	0	3.46	0	0	0	0	0	1	139.7	10	0	4.81	0	0	0	1	114	1	0
patient382	Normal	36.1	1	3.33	1	0	0	6	0.38	55	18	203	1.39	1	1	0	27.9	1.4	0	1	1	1	10.8	1	1	0	1	10.6	110.34	1	0	10.59	0	0	0	1	0	1	124.5	11	1	16.61	0	1	0	0	115	0	0
patient383	Normal	64.7	1	4.4	0	0	0	1	0.99	19	80	225	0.81	1	0	0	27	3	0	0	0	1	2.8	1	0	0	0	11.2	111.82	0	0	4.6	0	0	0	0	0	1	138.2	11	0	7.81	0	0	0	0	109	0	0
patient384	Normal	46.4	0	2.19	0	0	0	1	1.34	30	4	145	0.05	0	0	0	28.6	3.4	0	0	0	0	1.5	1	1	0	0	10.6	2.75	0	0	4.93	0	0	0	0	0	0	139.8	11	1	4.05	0	1	0	0	113	0	0
patient385	Normal	32.5	0	2.42	0	0	0	1	0.72	48	7	160	0.33	0	0	0	27.6	2.9	0	0	0	0	7.7	0	1	0	0	10.6	2.73	1	0	4.19	0	0	0	0	0	0	139.6	7	0	10.11	0	0	1	0	120	0	0
patient386	Normal	57	0	4.34	0	1	0	0.333333	1.48	52	47	183	0.38	0	0	0	27.6	3.9	0	0	0	1	3.8	1	1	0	0	9.9	15.2	1	0	11.9	0	0	0	0	0	1	137.2	15	0	4.47	0	0	0	0	110	1	0
patient387	Normal	57.5	0	2.19	1	1	0	2	1.18	80	12	177	0.16	0	0	0	26.3	3.6	0	0	0	0	5.9	1	0	0	0	10.7	3.78	1	1	5.14	0	0	0	0	0	1	141.6	10	0	2.96	0	0	0	0	122	0	0
patient388	Normal	27.2	1	4.92	0	0	0	5	1.18	48	37.5	273	0.25	0	1	0	28.2	2.9	0	0	1	1	8.9	1	0	0	1	11.4	34.52	1	0	12.69	0	0	0	0	0	1	133.5	12	0	6.83	0	0	0	0	124	0	0
patient389	Normal	29.8	0	5.99	1	0	0	2	0.47	70	74	183	0.24	0	1	0	26.8	2.7	0	0	0	1	10.7	1	0	0	1	12.9	49.19	1	0	4.65	0	0	0	0	0	1	137.1	7	0	3.83	0	0	0	0	109	1	0
patient390	Normal	41	0	4.81	1	0	0	120	0.76	60	108	196	1.05	0	0	0	26.8	2.2	0	0	0	1	10.4	1	0	0	0	11.2	43.42	1	0	3.28	0	0	0	0	1	1	134.1	3	0	10.37	0	1	0	0	101	0	0
patient391	Normal	59	0	3.39	0	1	0	8	1.4	77	11	223	0.68	1	0	0	26.3	2.8	0	0	0	1	23	1	0	0	1	12.5	5.33	1	0	4.3	0	0	0	0	0	1	143.1	19	0	4.34	0	0	0	0	107	0	0
patient392	Normal	23.9	0	3.39	1	0	0	2	0.94	35	47	189	0.06	0	0	0	27.9	2.4	0	0	0	0	4.6	1	1	0	0	11.1	20.52	1	0	4.15	0	0	0	0	0	0	137.9	6	0	3.34	0	0	0	0	104	0	0
patient393	Normal	74.7	0	4.08	0	1	0	24	1.27	79	37.5	259	0.21	1	0	0	25.4	4.1	0	0	0	1	15.2	1	0	0	0	11.2	9.04	1	0	3.31	0	0	0	0	0	1	140.1	10	0	8.17	0	1	0	0	102	0	0
patient394	Normal	34.4	1	3.47	0	1	0	1	2.05	50	104	395	0.74	1	0	0	24.7	2.8	0	1	1	1	6.3	1	0	0	1	10.6	18.23	1	0	3.98	0	0	1	0	0	1	138.5	10	0	11.95	1	0	0	0	109	0	1
patient395	Normal	36.6	0	2.88	0	0	0	600	0.17	80	17	111	0.21	1	0	1	31.2	4.5	0	0	0	1	18.4	1	1	0	0	12.5	110.7	0	1	5.59	0	0	0	0	0	1	140.2	109	0	4.27	0	0	0	0	101	0	0
patient396	Normal	70.4	1	5.22	1	1	0	0.133333	0.6	91	17	173	0.32	0	1	0	30.8	2.6	0	0	0	1	10.5	1	1	0	0	12.9	27.04	1	0	5	0	0	0	0	0	1	140.2	17	0	4.29	0	0	0	0	115	0	0
patient397	Normal	59.7	1	3.62	0	0	0	2	0.91	56	38	139	0.94	0	0	1	28.5	2.8	0	1	1	0	12	0	1	0	0	11.2	40.68	1	0	3.23	0	0	0	0	0	1	142.3	4	0	4.65	0	0	0	0	101	0	0
patient398	Normal	62.9	0	2.17	1	0	0	48	0.93	70	2	164	0.02	1	0	0	26.7	4.7	0	0	0	0	12.4	0	0	0	0	11.6	2.16	1	0	3.65	0	0	0	0	0	1	141.4	13	0	5.83	0	0	0	0	126	0	0
patient399	Normal	48.4	0	2.49	1	0	0	12	0.22	82	52	100	0.35	0	0	0	26.7	11.2	0	0	0	1	12.2	1	1	0	0	11.4	13.88	1	0	7.18	0	0	0	1	0	0	131.5	13	0	1.59	0	0	0	0	51	0	0
patient400	Normal	68.5	1	4.44	1	0	0	4	1.28	27	2	193	0.26	1	0	0	29.3	4.7	0	0	0	0	10	1	1	0	0	11.4	25.95	0	0	4.77	0	0	0	0	0	1	141.1	12	1	5.93	0	0	0	0	130	0	0
patient401	Normal	55	0	1.42	0	0	0	0.5	0.57	67	4	154	0.13	0	1	0	25.3	3.5	0	0	0	1	13.8	1	1	0	1	10.6	21.88	1	0	3.7	0	0	0	1	0	1	135.5	11	0	1.87	0	1	0	0	116	0	0
patient402	Normal	45.8	0	3.77	1	0	0	6	0.97	39	35	375	0.19	1	0	0	30.2	2.5	0	0	0	1	6.4	1	1	0	0	11.9	39.05	1	1	4.19	0	0	0	0	0	1	135.8	10	0	4.48	0	0	0	0	109	0	0
patient403	Normal	64.7	0	4.13	0	0	0	312	1.53	45	37.5	273	0.08	1	0	0	31	2.5	0	0	0	1	10.4	1	0	0	0	10.5	33.67	0	0	4.67	0	0	0	0	0	1	138	30	0	6.24	0	0	0	0	123	0	0
patient404	Normal	53.8	1	3.19	0	0	0	0.25	0.38	75	2	180	0.35	0	0	0	34.2	3.2	0	0	0	1	11	0	0	0	1	11.4	39.01	1	0	5.06	0	0	0	1	0	1	132.2	12	0	3.37	0	0	0	0	104	0	0
patient405	Normal	66.3	0	4.13	0	0	0	0.5	1.95	50	2	209	0.08	0	0	0	27.1	4	0	0	0	1	6.3	1	1	0	0	10.7	24.45	1	1	4.92	0	0	0	0	0	1	139.7	14	0	10.05	0	0	0	0	137	1	0
patient406	Normal	34.2	0	2.14	1	0	0	252	0.21	80	21	107	0.49	0	0	1	30.5	4.7	0	0	0	1	17.6	1	1	0	0	12.4	22.91	1	0	5.25	0	0	0	1	0	1	124.8	24	1	4.42	0	1	0	1	116	0	0
patient407	Normal	61.8	0	2.01	1	0	0	0.25	1.83	48	13	101	0.07	0	0	0	24.8	4.2	0	0	0	0	14.1	0	0	0	0	11.4	3.29	1	0	4.8	0	0	0	0	0	0	138.3	13	0	5.14	0	0	1	0	103	0	0
patient408	Normal	45.9	0	2.79	1	0	0	2	1.11	30	30	392	0.07	0	0	0	25.4	2.6	0	0	0	1	4.4	1	1	0	0	11	20.12	0	0	4.42	0	0	0	0	0	0	136.8	108	1	5.59	0	0	1	0	102	0	0
patient409	Normal	59.6	0	4.68	0	0	0	1	0.82	36	79	311	0.23	1	0	0	30.5	3.4	0	0	0	1	2.8	0	1	0	0	11	10.11	1	0	4.51	0	0	0	0	0	0	138.5	10	0	7.19	0	0	0	0	100	1	0
patient410	Normal	75.9	1	3.98	1	1	0	36	1.35	55	43	244	0.1	0	0	0	30.4	4.9	0	0	0	0	8.4	1	0	0	0	10	25.39	1	0	6.31	0	0	0	0	0	1	140.1	18	0	5.32	0	0	0	0	138	0	0
patient411	Normal	59.9	0	7.58	0	0	0	0.5	1.65	53	81	332	0.22	0	1	0	28.4	2.8	0	1	0	1	7.1	1	1	0	1	11.9	4.31	1	1	5.41	0	0	0	0	0	1	138.6	10	0	10.61	0	0	0	0	125	1	0
patient412	Normal	35.4	0	2.79	0	0	0	60	0.57	66	81	222	1.53	1	0	0	25.1	1.6	0	0	1	1	10.1	1	0	0	0	10.3	47.69	1	1	10.53	0	0	0	0	0	1	127.4	12	0	10.78	0	1	0	0	103	0	0
patient413	Normal	55	1	2.28	1	0	0	1	0.34	77	18	194	1	1	0	0	23.9	3.1	0	0	0	1	14.1	1	0	0	0	11.1	18.78	1	0	5.23	0	0	0	0	0	0	132.6	15	0	4.88	0	0	0	0	104	0	0
patient414	Normal	47.2	0	4.08	0	0	0	10	1.01	53	64	483	0.66	0	0	0	32.8	1.8	0	0	0	1	10.6	1	0	0	1	11.7	48.22	1	1	5.26	0	0	0	0	0	1	135.4	13	0	4.72	0	0	0	0	94	0	0
patient415	Normal	42	0	2.05	1	1	0	2	0.93	53	16	205	0.09	1	0	0	26.8	3.3	0	0	0	1	3.5	1	0	0	0	10.8	5.79	1	0	4.94	0	0	0	0	0	0	140	13	0	4.71	0	0	0	0	81	0	0
patient416	Normal	48.4	0	4.52	0	1	0	120	1.4	75	78	352	0.24	0	0	0	29.1	2.3	0	0	1	1	12.9	0	0	0	0	13	123.66	1	0	5.39	0	0	0	0	0	1	134.4	10	0	11.89	0	1	0	0	51	0	0
patient417	Normal	61.1	1	4.04	0	0	0	12	0.51	65	51	204	0.33	1	0	1	34.3	3.9	0	0	1	1	11.3	1	0	0	0	12.6	10.6	1	1	4.49	0	0	0	0	0	1	140.5	17	0	3.42	0	0	0	0	94	0	0
patient418	Normal	39.4	0	4.04	0	1	0	3	0.3	71	46	199	0.6	0	0	0	31	2.7	0	1	1	1	10.7	1	0	0	0	11.7	22.82	1	0	4.04	0	0	0	0	1	1	135.7	6	0	16.95	0	1	0	0	101	0	0
patient419	Normal	13.4	1	3.03	0	0	0	1	0.63	78	38	185	0.82	1	0	0	28.5	4.9	0	0	1	1	11.1	1	0	0	1	11.5	46.39	1	0	3.84	0	0	0	1	0	1	137.2	12	0	6.02	0	0	0	0	62	0	0
patient420	Normal	49.5	0	2.11	0	1	0	0.333333	0.05	44	36	10	0.47	0	0	0	28.4	11	0	0	0	1	14.2	1	1	0	0	10.9	111.76	1	0	4.98	0	0	0	0	0	1	135.3	11	0	0.98	0	0	0	1	54	0	1
patient421	Normal	41.8	0	3.61	0	0	0	0.0666667	1.38	72	31	372	0.5	0	0	0	29.1	5.3	0	0	0	0	10.6	0	1	0	0	11.5	13.6	1	0	3.95	0	0	0	0	0	0	140.7	11	0	6.35	0	0	0	1	105	1	0
patient422	Normal	48.5	0	4.13	1	0	0	6	1.5	25	52	197	0.43	1	0	0	29.9	3.7	0	0	0	0	4.8	0	1	0	0	12.2	36.63	1	0	5.39	0	0	0	0	0	0	138.8	23	1	6.13	0	1	0	0	106	0	0
patient423	Normal	56.3	0	5.99	0	0	0	60	0.57	69	63	302	0.21	0	1	0	28.8	3.1	0	0	0	1	8.1	0	1	0	0	11.7	46.39	1	0	20.1	0	0	0	0	0	1	125.8	4	0	7	0	1	0	0	100	1	0
patient424	Normal	47.3	1	3.19	0	0	0	2	0.67	68	4	472	0.91	0	0	0	25.4	2.9	0	1	1	1	10.6	1	0	0	1	10.6	132.89	1	0	3.86	0	0	0	0	0	1	133.7	14	0	6.58	1	0	0	0	102	0	1
patient425	Normal	60.2	0	1.36	1	0	0	2	1.12	48	3	320	0.28	1	0	0	24.7	2.9	0	0	0	1	6	1	0	0	0	11.3	27.78	1	1	4.58	0	0	0	0	0	1	139.5	17	0	5.77	0	0	0	0	120	1	0
patient426	Normal	70.2	0	6.34	1	1	0	480	1.93	66	75	339	0.06	1	1	0	27.7	3.3	0	0	1	0	12.3	0	1	0	1	10.6	41.86	1	0	5.54	0	0	0	0	0	1	138.5	10	1	10.44	0	0	1	0	123	0	0
patient427	Normal	69.1	0	2.78	0	0	0	120	1.37	86	37.5	117	0.23	0	0	0	27.9	4.1	0	0	0	1	13.7	1	0	0	0	13	12.46	1	0	4.42	0	0	0	0	0	1	141.7	14	0	4.53	0	1	0	0	112	1	0
patient428	Normal	122.5	0	2.53	1	0	0	2	0.97	24	100	433	1.88	1	0	0	33	10.7	0	0	0	1	3.7	1	0	0	0	11.9	11.18	0	0	15.13	0	0	0	1	0	1	131.6	6	0	10.26	0	1	0	0	58	0	0
patient429	Normal	44.1	1	3.27	0	0	0	1	0.8	26	33	296	0.36	0	0	0	27.9	2.3	0	0	0	1	5.9	1	1	0	1	12.3	50.67	0	1	3.97	0	0	0	0	0	1	136.2	12	0	5.06	0	0	0	0	68	0	0
patient430	Normal	66.6	0	4.4	0	0	0	12	0.78	88	44	306	1.11	0	0	0	28.1	3.8	0	0	0	1	11.5	1	0	0	0	14	64.31	1	1	8.58	0	0	0	0	1	1	135.5	27	0	12.38	0	1	0	0	132	0	0
patient431	Normal	53.6	0	2.93	0	0	0	3	1.37	64	29	305	0.15	1	0	0	29.9	3.2	0	0	0	1	18.1	1	1	0	0	11.8	23.67	0	0	4.54	0	0	0	0	0	1	138.6	131	0	6.98	0	0	0	0	132	0	0
patient432	Normal	45.6	0	3.88	1	0	0	1	1.31	81	60	276	0.14	1	0	1	32.4	2.8	0	0	0	1	7.8	1	0	0	0	11.4	27.28	1	0	4.14	0	0	0	1	0	1	136.5	8	0	5.08	0	1	0	0	71	0	0
patient433	Normal	51.3	0	5.22	1	0	0	3	0.93	52	63	395	0.23	0	0	0	29.3	2.1	0	0	0	1	22.3	1	1	0	0	11.9	16.26	0	1	16.93	0	0	0	0	0	0	133.1	7	0	12.72	0	0	0	0	123	1	0
patient434	Normal	67.6	1	4.29	0	0	0	0.0666667	1.06	34	37.5	373	0.25	0	0	0	30.7	2.4	0	0	0	1	6.9	1	1	0	0	12.7	51.17	1	1	4.94	0	0	0	0	0	1	135.3	10	0	8.66	0	0	0	0	126	1	0
patient435	Normal	113	0	3.06	0	0	0	1	1.39	70	44	269	0.15	0	0	0	29.7	4.3	0	0	0	1	17.2	1	1	0	0	10.6	29.72	0	0	5.18	0	0	0	1	0	1	138.9	13	0	8.47	0	1	0	0	138	0	0
patient436	Normal	66.2	1	4.68	0	0	0	9	0.69	80	38	234	0.29	0	0	0	25.7	3.1	0	0	0	1	10.5	1	1	0	0	11.2	42.74	1	0	5.1	0	0	0	0	0	0	135.4	10	0	2.99	1	1	0	0	105	0	1
patient437	Normal	54.2	0	4.81	1	1	0	0.666667	1.18	70	51	237	0.31	1	1	0	25.4	4.8	0	0	0	1	10.5	1	0	0	1	10.8	60.22	1	0	16.76	0	0	0	0	0	1	137	11	0	8.01	0	0	0	0	109	1	0
patient438	Normal	47.1	0	3.09	0	0	0	24	0.88	75	40	233	2.73	0	0	0	36.2	4.2	0	0	1	1	27.7	1	1	0	0	15.1	100.57	1	0	4.19	0	0	0	1	1	1	136.2	19	0	5.18	0	1	0	0	101	0	0
patient439	Normal	57.2	0	2.49	0	0	0	1	1.26	25	16	144	0.06	0	0	0	29.4	3.7	0	0	0	1	8.1	1	1	0	0	11.2	2.23	0	0	5.11	0	0	0	0	0	1	139.6	16	0	4.95	0	0	0	0	138	0	0
patient440	Normal	52	0	8.07	1	0	0	3	0.6	59	70	374	0.28	0	0	0	26.4	2.5	0	0	1	1	12.3	1	0	0	0	10.6	60.72	1	0	4.88	0	0	0	0	0	0	135	11	0	5.95	1	0	0	0	80	0	1
patient441	Normal	59.2	0	1.95	1	1	1	1	0.85	77	27	62	1.49	1	0	0	24.5	3.5	0	0	1	1	10.9	1	0	0	0	11.6	0.64	1	0	5.43	0	0	0	0	0	0	138.6	24	0	2.54	0	0	0	0	100	0	0
patient442	Normal	57.3	0	2.13	0	0	0	1	1.4	55	36	187	0.11	0	1	0	32.5	3.4	0	0	0	1	13	1	0	0	1	10.6	10.27	1	1	4.29	0	0	0	0	0	1	140.7	26	0	4.47	0	1	0	0	126	1	0
patient443	Normal	35.2	0	4.68	0	0	0	3	1.28	25	52	338	0.16	1	0	0	28.1	1.8	0	1	1	1	5.2	1	0	0	0	11.3	24.47	0	0	4.41	0	0	0	0	0	0	140.6	11	1	7.33	0	0	0	0	96	1	0
patient444	Normal	58.3	0	4.4	1	0	0	0.0333333	1.69	32	17	147	0.02	0	0	0	28.7	3.7	0	1	0	1	7	0	1	0	1	11	21.94	1	0	5.77	0	0	0	0	0	1	142.8	6	0	7.7	0	0	0	0	130	0	0
patient445	Normal	43.9	0	4.18	0	0	0	120	0.85	64	41	301	1.81	1	0	0	30.2	3.3	0	0	0	1	12.2	1	0	0	0	11.4	22.16	1	1	4.7	0	0	0	1	0	1	140.2	4	0	4.41	0	1	0	0	106	0	0
patient446	Normal	58.6	0	3.88	0	1	0	12	0.79	63	5	180	0.09	0	1	0	29.4	7.9	0	0	0	1	9.2	1	1	0	1	10.4	2.26	1	0	7.86	0	0	0	0	0	1	140.9	8	1	4.82	0	1	0	0	127	1	0
patient447	Normal	46.9	1	3.51	0	1	0	6	1.23	84	37.5	309	0.3479	1	0	0	28.4	3	0	0	0	1	7.1	1	1	0	0		53.28	0	0	6.47	0	0	0	0	0	0	133.7	8	0	13.12	0	0	0	0	74	0	0
patient448	Normal	35.8	0	4.23	0	0	0	6	1.13	66	17	228	0.17	1	0	0	27	4	0	0	0	1	8.8	1	1	0	1	10.9	22.08	1	0	5.92	0	0	0	0	0	1	140.8	7	0	6.73	0	0	0	0	132	0	0
[truncated: 11 more columns]

## Sheet: test
ID	MDR(Yes =1, No =0)	CREA(umol/L)	Fever(Yes =1, No =0)	FIB（g/L）	Invasive-operation(Yes =1, No =0)	Disease-duration(Months)	LYMPH（*10^9/L）	Age(Years)	PLT（*10^9/L）	D-D(mg/L)	APTT(s)
patient1	0	60.16	1	3.49	0	2.7	0.66	52	318	0.08	24.6
patient2	0	37.76	0	3.39	0	216	1.14	42	210	0.09	25.4
patient3	0	28.72	0	6.82	0	0.06	1.19	65	543	0.15	28.6
patient4	0	44	1	5.39	1	1.8	0.77	36	303	0.13	25.4
patient5	0	29.6	0	3.19	0	10.8	0.57	91	164	0.63	29.4
patient6	0	50.88	1	2.28	0	5.4	1.3	24	182	0.06	26.4
patient7	0	30.96	0	4.07	1	9	1.13	70	396	1.55	24.2
patient8	0	68.16	0	2.24	1	0.6	1.76	26	212	0.03	26.5
patient9	0	27.28	0	3.49	1	0.9	0.44	68	233	0.42	23.3
patient10	0	34.48	0	3.96	1	0.45	1.17	68	257	0.12	20.3
patient11	0	50.32	0	3.91	1	1.8	1.28	68	254	0.18	25.2
patient12	0	58	1	4.43	0	2.7	0.59	64	205	0.17	24.6
patient13	0	52.48	0	2.42	0	2.7	2.73	58	148	0.07	28.4
patient14	0	44.56	0	2.59	1	2.7	1.7	27	172	0.02	24.9
patient15	0	34.4	0	4.7	1	5.4	1.08	67	313	0.21	27.8
patient16	0	50.72	0	3.47	0	64.8	1.32	32	200	0.24	25.1
patient17	0	51.84	0	2.39	0	0.225	1.09	29	199	0.04	29.3
patient18	0	34.16	0	4.3	1	21.6	0.98	71	222	0.12	25.2
patient19	0	37.12	1	3.49	0	0.225	1.01	27	176	0.25	23.1
patient20	0	36.08	1	4.84	0	0.9	1.38	66	488	1.23	26.9
patient21	0	40.24	1	4.7	0	0.225	1.33	18	334	0.51	26.8
patient22	0	30.08	0	3.91	1	5.4	1.54	53	169	0.04	29.4
patient23	0	44	0	2.01	1	0.6	1.67	43	236	0.04	27.5
patient24	0	63.12	0	1.75	1	0.3	1.56	42	153	0.04	25.9
patient25	0	26.24	0	2.15	0	13.5	0.86	67	202	0.61	28.8
patient26	0	37.92	0	4.07	0	97.2	0.45	62	129	0.04	30.2
patient27	0	61.92	0	1.76	1	4.5	1.56	22	194	0.04	26.5
patient28	0	81.92	1	5.71	0	0.12	0.29	56	124	0.29	29.7
patient29	0	37.2	0	6.05	0	0.225	0.39	72	263	1.13	28.4
patient30	0	38.72	0	2.99	0	648	0.71	83	184	0.15	26.1
patient31	0	40.24	0	4.7	0	10.8	0.78	82	365	0.27	27.5
patient32	0	41.52	1	2.51	0	21.6	0.95	55	181	0.04	24.5
patient33	0	37.84	1	2.21	1	54	1.82	48	313	0.09	28.5
patient34	0	32.08	0	3.96	1	21.6	1.41	55	204	0.46	24.6
patient35	0	33.2	1	3.16	0	1.8	0.58	78	234	0.31	26.7
patient36	0	47.12	0	4	0	270	1.06	81	160	0.1	21.8
patient37	0	36.96	0	3.58	0	1.8	0.82	60	174	0.94	27.1
patient38	0	18.48	1	4.43	0	21.6	0.37	82	466	0.59	23.3
patient39	0	44.24	0	2.89	0	0.45	0.75	74	183	0.2	25.2
patient40	0	47.92	1	4.43	1	0.9	0.62	66	14	0.51	27.1
patient41	0	31.2	0	3.26	1	0.12	0.72	73	212	0.15	24.9
patient42	0	56.56	1	2.28	1	1.8	0.96	21	147	0.34	24.6
patient43	0	67.76	0	3.64	0	216	0.38	70	200	0.41	27.3
patient44	0	31.04	0	3.05	1	10.8	1.07	32	268	0.08	24.8
patient45	0	62.08	0	3.19	1	1.8	0.77	68	224	2.97	28.7
patient46	0	35.76	0	4.1	1	5.4	1.35	27	311	0.43	32.3
patient47	0	28.8	0	4.92	0	5.4	1.16	38	257	0.13	28.4
patient48	0	26.24	0	3.55	0	0.09	1.01	20	200	0.04	26.7
patient49	0	27.76	0	3.55	1	1.8	1.02	77	340	0.09	27.2
patient50	0	43.04	1	3.86	1	0.21	1.69	24	301	0.97	27.4
patient51	0	36.16	1	3.96	0	21.6	1.07	59	204	0.31	24.6
patient52	0	50.08	0	3.12	0	0.21	1.45	24	196	0.07	26.1
patient53	0	115.92	0	3.19	0	1.8	0.41	67	200	1.5	26.1
patient54	0	14.96	0	4.7	0	54	0.81	40	167	0.28	25.4
patient55	0	27.2	0	1.94	0	108	1.02	51	268	0.05	24.9
patient56	0	36.08	0	3.76	1	1.8	0.87	79	145	1.04	24.4
patient57	0	57.04	0	2.81	0	21.6	0.79	79	179	0.07	23.8
patient58	0	60.48	1	1.87	0	0.225	0.48	83	124	0.55	29.5
patient59	0	29.92	1	4.3	0	0.6	1.05	54	185	0.32	25.5
patient60	0	25.04	0	4.84	0	1.8	0.14	17	108	0.32	27.2
patient61	0	26.56	1	3.96	0	1.8	0.93	26	257	0.21	27.2
patient62	0	27.92	1	3.58	0	0.6	0.92	17	299	0.16	27
patient63	0	31.92	0	3.67	0	5.4	0.47	63	171	0.5	22
patient64	0	27.68	0	1.67	0	1.8	1.28	30	149	0.04	25.7
patient65	0	27.84	1	2.29	1	2.7	0.29	73	200	0.92	25.2
patient66	1	60.93	0	4.24	0	5.7	0.86	53	160	0.11	26.2
patient67	1	71.82	0	2.43	0	5.7	0.85	51	196	0.03	27.8
patient68	1	40.77	0	1.5	1	3.8	0.95	25	169	0.03	25.9
patient69	1	80.64	0	3.09	1	1.9	2.21	53	88	0.3	26.7
patient70	1	46.71	0	4.11	1	5.7	1.7	27	481	0.24	27.9
patient71	1	75.96	0	3.13	0	22.8	1.93	42	225	0.05	25.7
patient72	1	62.01	0	3.89	0	68.4	1.99	53	261	0.28	26.4
patient73	1	71.28	1	5.76	0	228	1.08	51	197	0.16	30.7
patient74	1	46.53	0	1.87	1	0.95	1.34	21	175	0.03	29.1
patient75	1	42.84	0	3.52	1	0.2375	2.09	28	174	0.08	31.1
patient76	1	27.54	0	2.94	0	0.95	0.59	78	50	0.38	30.7
patient77	1	63.9	1	4.98	0	0.316667	1.23	51	346	0.12	25.5
patient78	1	42.12	0	1.34	0	2.85	1.8	21	230	0.05	30.6
patient79	1	56.61	0	1.67	0	4.75	1.94	19	209	0.03	27.9
patient80	1	70.65	0	3.48	1	79.8	1.1	48	140	0.08	24.3
patient81	1	74.52	0	5.14	0	45.6	1.31	60	271	0.03	27.5
patient82	1	43.11	1	5.76	0	45.6	0.85	57	224	0.11	28.2
patient83	1	73.98	0	2.24	1	0.633333	1.61	67	244	0.13	26.9
patient84	1	57.78	0	2.56	0	57	1.51	85	203	0.12	26.7
patient85	1	57.15	0	4.02	0	182.4	1.62	39	371	0.2	30.7
patient86	1	76.14	0	2.2	0	6.65	1.08	60	219	0.06	29.4
patient87	1	67.32	0	2.73	0	11.4	0.64	57	188	0.08	24.3
patient88	1	45.45	0	3.7	1	11.4	1.8	62	120	0.42	27.2
patient89	1	57.33	0	3.41	1	114	0.98	74	109	0.05	25.2
patient90	1	53.55	0	1.98	0	11.4	1.7	49	183	0.02	29.4
patient91	1	63.09	0	2.46	1	34.2	1.61	60	223	0.03	25.3
patient92	1	41.49	0	3.56	1	1.9	0.42	31	181	1.55	26.2
patient93	1	64.8	0	3.64	1	1.9	1.2	69	298	0.07	25.9
patient94	1	59.94	0	3.7	0	57	1.23	69	326	0.23	25.9
patient95	1	57.51	1	1.98	1	0.475	1.69	17	208	0.08	30.6
patient96	1	55.17	0	2.77	0	342	0.74	60	105	0.13	31.3
patient97	1	37.89	0	2.83	1	0.475	0.8	65	214	0.16	25.5
patient98	1	65.25	0	3	0	114	0.55	74	76	0.16	30.2
patient99	1	54.99	0	3.06	0	11.4	0.92	54	299	0.03	25.8
patient100	1	80.55	0	2.31	0	22.8	0.87	52	234	0.12	28.7
patient101	1	49.23	0	1.93	1	34.2	0.96	44	276	0.15	25.6
patient102	1	54.27	0	2.31	0	11.4	1.43	66	163	0.05	23.5
patient103	1	54.09	0	2.42	0	57	0.45	59	123	0.07	29.4
patient104	1	76.77	1	1.4	0	7.6	1.21	27	167	0.03	30.2
patient105	1	53.1	0	3.64	0	228	0.99	56	192	0.04	23.6
patient106	1	90.63	0	1.65	0	9.5	1.43	31	178	0.03	27.4
patient107	1	61.29	0	1.29	1	22.8	1.34	24	149	0.03	29.2
patient108	1	59.4	0	2.52	0	10.45	1.26	66	138	0.08	26.7
patient109	1	61.38	0	2.38	0	57	1.81	78	334	0.11	30
patient110	1	35.64	0	5.43	0	5.7	0.54	63	213	0.34	28.8
patient111	1	25.65	0	3.41	0	22.8	1.35	69	209	0.18	23.6
patient112	1	60.12	0	1.85	0	22.8	1.62	26	162	0.04	24.1
patient113	1	78.75	0	1.93	0	10.45	1.98	31	206	0.07	23.1
patient114	1	89.28	0	2.78	1	45.6	0.62	60	284	0.02	35.1
patient115	1	86.13	0	3.56	0	7.6	1.2	73	242	0.03	27.5
patient116	1	45.36	0	2.56	1	57	1.31	39	158	0.09	30.2
